# Supplementary material for: Absence of HTATIP2 Expression in A549 Lung Adenocarcinoma Cells Promotes Tumor Plasticity in Response to Hypoxic Stress
Source: PubMed Central journal article supplement (PMC7352940; doi:10.3390/cancers12061538), 2020-06-11
Supplement: cancers-12-01538-s001.pdf [file cancers-12-01538-s001.pdf]

# Absence of HTATIP2 Expression in A549 Lung Adenocarcinoma Cells Promotes Tumor Plasticity in Response to Hypoxic Stress

Minghua Li, Jing Li, Xiaofang Guo, Hua Pan and Qingyu Zhou

**Table S1.** Primary antibodies used in Western blot analyses.

| Protein                                   | Molecular Size (kDa)                    | Manufacturer              | Catalog Number |
|-------------------------------------------|-----------------------------------------|---------------------------|----------------|
| Akt                                       | 60                                      | Cell Signaling Technology | 4691           |
| Phospho-Akt (S473)                        | 60                                      | Cell Signaling Technology | 4051           |
| ERK1/2                                    | 42, 44                                  | Cell Signaling Technology | 4695           |
| Phospho-ERK1/2 (T202/Y204)                | 42, 44                                  | Cell Signaling Technology | 4370           |
| GSK3 $\alpha$ /3 $\beta$                  | 51 (GSK3 $\alpha$ ), 46 (GSK3 $\beta$ ) | Cell Signaling Technology | 5676           |
| Phospho-GSK3 $\alpha$ /3 $\beta$ (S21/S9) | 51, 46                                  | Cell Signaling Technology | 9331           |
| MEK1/2                                    | 42                                      | Cell Signaling Technology | 8727           |
| Phospho-MEK1/2 (S217/S221)                | 42                                      | Cell Signaling Technology | 9154           |
| mTOR                                      | 289                                     | Cell Signaling Technology | 4517           |
| Phospho-mTOR (S2448)                      | 289                                     | Cell Signaling Technology | 2971           |
| RSK1/2/3                                  | 90                                      | Cell Signaling Technology | 9355           |
| Phospho-p90RSK (S380)                     | 90                                      | Cell Signaling Technology | 11989          |
| HIF1 $\alpha$                             | 120                                     | Cell Signaling Technology | 36169          |
| HIF2 $\alpha$                             | 120                                     | Cell Signaling Technology | 59973          |
| HTATIP2                                   | 28, 32                                  | Cell Signaling Technology | 14614          |
| c-MYC                                     | 57-65                                   | Cell Signaling Technology | 18583          |
| MCL-1                                     | 40                                      | Cell Signaling Technology | 5453           |
| MXI-1                                     | 33                                      | Thermo Fisher Scientific  | PA5-71929      |
| E-Cadherin                                | 130                                     | Cell Signaling Technology | 3195           |
| $\beta$ -Catenin                          | 92                                      | Cell Signaling Technology | 8480           |
| Vimentin                                  | 50, 57                                  | Cell Signaling Technology | 5741           |
| $\beta$ -Actin                            | 42                                      | Cell Signaling Technology | 3700           |

Note: Individual primary antibodies were used at a dilution of 1:1000 in Western blot analysis.

**Table S2.** Primers used in the quantitative real-time PCR.

| Human Gene                     | Forward 5' $\rightarrow$ 3' | Reverse 5' $\rightarrow$ 3' |
|--------------------------------|-----------------------------|-----------------------------|
| <i>HTATIP2</i>                 | CGGAGGGATTGTTCGTGTT         | TGAAATGTTTGCACCCTCCA        |
| <i>HIF1<math>\alpha</math></i> | AAGGTATTGCACTGCACAGG        | TCAGCACCAAGCAGGTCATA        |
| <i>HIF2<math>\alpha</math></i> | TCTACCATGCGCTAGACTCC        | CCGGTACTGGCCACTTACTA        |
| <i>c-Myc</i>                   | ATTCTCTGCTCTCCTCGAC         | CTTCCTCATCTTCTGTTCCTC       |
| <i>MXI1</i>                    | CGGCACACAACACTTGGTT         | AAATTCTCGAGCTGGTGCTG        |
| <i>VEGFA</i>                   | AATGACGAGGGCCTGGAG          | GCCTTGGTGAGGTTTGATCC        |
| <i>PDGFB</i>                   | CGAGTTGGACCTGAACATGA        | CTCAGCAATGGTCAGGGAAC        |
| <i>GLUT-1</i>                  | ATTGGCTCCGGTATCGTCAAC       | GCTCAGATAGGACATCCAGGTA      |
| <i>GAPDH</i>                   | GGACTCATGACCACAGTCCA        | AGGCAGGGATGATGTTCTGG        |

**Table S3.** Concentrations of individual metabolites in A549 and A549shHTATIP2 tumors determined by the LC-MS/MS.

|       | Component Name                                                              | Metabolite Concentration (pmol/mg tissue) |        |                       |         |
|-------|-----------------------------------------------------------------------------|-------------------------------------------|--------|-----------------------|---------|
|       |                                                                             | A549 (N = 4)                              |        | A549shHTATIP2 (N = 6) |         |
|       |                                                                             | Mean                                      | SD     | Mean                  | SD      |
| 1     | M001_L-Tryptophan                                                           | 87.90                                     | 11.68  | 88.48                 | 18.15   |
| 2     | M002_L-Kynurenine                                                           | 0.342                                     | 0.105  | 0.244                 | 0.054   |
| 3     | M003_Serotonin                                                              | 0.074                                     | 0.034  | 0.057                 | 0.029   |
| 4     | M004_5-Hydroxyindoleacetic acid                                             | 0.302                                     | 0.072  | 0.484                 | 0.315   |
| 5     | M005_Kynurenic acid                                                         | 0.037                                     | 0.053  | 0.005                 | 0.005   |
| 6     | M008_Succinic acid                                                          | 18.358                                    | 5.107  | 22.304                | 3.960   |
| 7     | M009_Fumaric acid                                                           | 85.601                                    | 8.452  | 85.283                | 11.963  |
| 8     | M012_L-Malic acid                                                           | 340.92                                    | 25.99  | 382.26                | 56.63   |
| 9     | M013_Succinyl-CoA                                                           | 0.811                                     | 0.310  | 0.408                 | 0.228   |
| 10    | M015_Acetyl-CoA                                                             | 0.180                                     | 0.082  | 0.078                 | 0.045   |
| 11    | M016_2-ketoglutaric acid                                                    | 3.695                                     | 1.190  | 3.563                 | 2.718   |
| 12–14 | M019_Fructose 6-phosphate+M106_Glucose 6-phosphate+M051_Glucose 1-phosphate | 1312.4                                    | 460.1  | 1071.9                | 220.1   |
| 15    | M020_Fructose 1,6-bisphosphate                                              | 621.46                                    | 88.70  | 791.40                | 221.92  |
| 16–17 | M021_2-Phosphoglyceric acid+M305_3-Phosphoglyceric acid                     | 31.792                                    | 7.572  | 41.442                | 19.019  |
| 18    | M023_L-Valine_new                                                           | 475.11                                    | 14.04  | 501.94                | 37.15   |
| 19    | M024_Leucine(s)                                                             | 645.718                                   | 53.426 | 619.828               | 62.997  |
| 20    | M025_Histidine                                                              | 399.568                                   | 55.322 | 369.052               | 133.617 |
| 21    | M026_Phenylalanine                                                          | 249.263                                   | 20.269 | 238.411               | 30.155  |
| 22    | M027_Glutamine(s)                                                           | 225.530                                   | 62.680 | 116.533               | 27.750  |
| 23    | M028_Tyrosine                                                               | 305.283                                   | 54.284 | 342.513               | 60.839  |
| 24    | M029_Isoleucine(s)                                                          | 272.931                                   | 25.549 | 285.365               | 17.459  |
| 25    | M030_Threonine(s)                                                           | 398.780                                   | 29.433 | 363.121               | 30.743  |
| 26    | M031_L-Glutamic acid                                                        | 1496.4                                    | 148.8  | 1638.8                | 220.1   |
| 27    | M032_Arginine                                                               | 87.835                                    | 11.626 | 83.393                | 13.570  |
| 28    | M033_Lysine (s)                                                             | 245.48                                    | 47.89  | 246.83                | 46.57   |
| 29    | M034_S-Adenosylmethionine                                                   | 2.821                                     | 0.607  | 1.771                 | 0.632   |
| 30–31 | M035_Dihydroxyacetone phosphate+M097                                        | 141.04                                    | 11.89  | 128.43                | 42.98   |
| 32    | M036_Picolinic acid                                                         | 193.05                                    | 22.67  | 173.34                | 21.81   |
| 33    | M039_NADP                                                                   | 7.928                                     | 2.463  | 3.102                 | 2.303   |
| 34    | M041_NAD                                                                    | 1.286                                     | 0.520  | 0.789                 | 0.367   |
| 35    | M043_Dephospho-CoA                                                          | 3.349                                     | 0.979  | 1.891                 | 0.698   |
| 36    | M046_3-Hydroxy-3-methylglutaryl-CoA                                         | 0.005                                     | 0.003  | 0.005                 | 0.004   |
| 37    | M047_Nicotinamide                                                           | 188.11                                    | 19.95  | 170.27                | 20.83   |
| 38    | M048_AICAR                                                                  | 0.781                                     | 0.852  | 0.671                 | 0.274   |
| 39    | M049_S-Adenosylhomocysteine                                                 | 2.987                                     | 1.109  | 1.952                 | 0.996   |
| 40    | M050_Deoxyribose 5-phosphate                                                | 1.833                                     | 0.580  | 1.510                 | 0.371   |
| 41    | M052_dUMP                                                                   | BLQ                                       | BLQ    | BLQ                   | BLQ     |
| 42    | M054_Hypoxanthine                                                           | 775.4                                     | 147.5  | 802.6                 | 215.3   |
| 43    | M055_D-Ribose 5-phosphate                                                   | 53.932                                    | 26.756 | 32.204                | 14.282  |
| 44    | M056_Glutathione                                                            | 953.7                                     | 267.7  | 302.1                 | 229.6   |
| 45    | M057_Gluconic acid                                                          | 111.38                                    | 16.15  | 100.72                | 22.25   |
| 46    | M058_Uric acid (s)                                                          | 83.85                                     | 20.38  | 106.85                | 51.00   |
| 47    | M062_1-Methylhistidine                                                      | 4.335                                     | 1.030  | 4.337                 | 0.602   |
| 48    | M063_1-Methylnicotinamide                                                   | 11.114                                    | 1.881  | 12.931                | 1.989   |
| 49    | M064_Gentisic acid                                                          | BLQ                                       | BLQ    | BLQ                   | BLQ     |
| 50    | M065_Deoxycytidine                                                          | BLQ                                       | BLQ    | BLQ                   | BLQ     |
| 51    | M068_2-Ketohexanoic acid_NEG                                                | 0.085                                     | 0.019  | 0.125                 | 0.081   |
| 52    | M069_5-Methoxytryptophan                                                    | BLQ                                       | BLQ    | BLQ                   | BLQ     |
| 53    | M070_L-Acetylcarnitine                                                      | 62.853                                    | 5.272  | 64.833                | 3.321   |
| 54    | M071_N-Alpha-acetyllysine                                                   | 0.640                                     | 0.421  | 0.369                 | 0.189   |
| 55    | M072 cis aconitic acid same as M007                                         | 0.761                                     | 0.231  | 0.841                 | 0.359   |
| 56    | M073_Adenosine                                                              | 13.171                                    | 5.226  | 9.953                 | 2.426   |
| 57    | M074_Adenosine diphosphate ribose                                           | 1.483                                     | 1.707  | 0.330                 | 0.092   |
| 58    | M075_ADP                                                                    | 19.295                                    | 19.004 | 7.593                 | 2.276   |
| 59    | M076_Agmatine                                                               | 18.330                                    | 5.102  | 9.474                 | 3.452   |
| 60    | M077_Amino adipic acid                                                      | 12.495                                    | 3.855  | 8.369                 | 2.682   |

|     |                                              |        |        |         |        |
|-----|----------------------------------------------|--------|--------|---------|--------|
| 61  | M078_aminolevulinic acid                     | BLQ    | BLQ    | BLQ     | BLQ    |
| 62  | M079_AMP                                     | 0.293  | 0.315  | BLQ     | BLQ    |
| 63  | M080_Biotin                                  | 0.005  | 0.001  | 0.007   | 0.003  |
| 64  | M082_Butrylcholine                           | BLQ    | BLQ    | BLQ     | BLQ    |
| 65  | M083_Carnitine                               | 36.445 | 7.146  | 43.063  | 7.138  |
| 66  | M084_Chlorzoxazone                           | BLQ    | BLQ    | BLQ     | BLQ    |
| 67  | M086_Citrulline                              | 73.034 | 26.724 | 72.747  | 14.748 |
| 68  | M087_CMP                                     | 12.872 | 1.042  | 12.109  | 2.726  |
| 69  | M089_Cytosine                                | BLQ    | BLQ    | BLQ     | BLQ    |
| 70  | M090_dAMP                                    | 1.005  | 0.275  | 0.637   | 0.411  |
| 71  | M092_deoxyinosine                            | 0.335  | 0.047  | 0.354   | 0.099  |
| 72  | M093_Deoxyuridine                            | BLQ    | BLQ    | BLQ     | BLQ    |
| 73  | M096_DL-2-Aminooctanoic acid                 | 0.205  | 0.061  | 0.238   | 0.092  |
| 74  | M097_D-Glyceraldehyde 3-phosphate(s)         | BLQ    | BLQ    | BLQ     | BLQ    |
| 75  | M099_FAD                                     | 10.691 | 1.655  | 9.005   | 1.639  |
| 76  | M100_Flavone                                 | BLQ    | BLQ    | BLQ     | BLQ    |
| 77  | M101_Folic acid                              | BLQ    | BLQ    | BLQ     | BLQ    |
| 78  | M105_glucosamine                             | BLQ    | BLQ    | BLQ     | BLQ    |
| 79  | M107_Glucuronic acid                         | 4.506  | 0.932  | 3.230   | 0.934  |
| 80  | M109_GMP                                     | BLQ    | BLQ    | BLQ     | BLQ    |
| 81  | M112_Guanidoacetic acid                      | 5.806  | 0.442  | 4.622   | 1.267  |
| 82  | M113_Guanine                                 | 2.505  | 0.630  | 3.694   | 1.342  |
| 83  | M114_Guanosine                               | 27.268 | 8.151  | 12.883  | 4.559  |
| 84  | M117_Homoserine (s)                          | 4.209  | 0.221  | 4.592   | 0.598  |
| 85  | M118_Hydroxyisocaproic acid                  | 2.329  | 0.484  | 3.248   | 0.600  |
| 86  | M121_Imidazole                               | 0.174  | 0.062  | 0.319   | 0.154  |
| 87  | M122_Imidazoleacetic acid                    | 6.298  | 0.994  | 6.506   | 2.113  |
| 88  | M123_IMP                                     | BLQ    | BLQ    | BLQ     | BLQ    |
| 89  | M124_Indole                                  | 2.717  | 0.987  | 3.234   | 1.796  |
| 90  | M125_Indole-3-carboxylic acid                | BLQ    | BLQ    | BLQ     | BLQ    |
| 91  | M126_Indoleacrylic acid                      | 0.004  | 0.003  | 0.006   | 0.004  |
| 92  | M127_Lipoic acid                             | BLQ    | BLQ    | BLQ     | BLQ    |
| 93  | M128_L-Pipecolic acid (s)                    | 20.168 | 6.540  | 28.865  | 7.279  |
| 94  | M129_Methionine sulfoxide                    | 3.376  | 1.152  | 3.087   | 0.823  |
| 95  | M131_N-Acetyl-L-aspartic acid                | 17.231 | 2.170  | 21.174  | 5.888  |
| 96  | M132_N-Acetyl-D-glucosamine                  | 7.491  | 1.809  | 9.734   | 2.589  |
| 97  | M133_N-Acetyl-L-alanine (s)                  | 399.09 | 31.00  | 409.69  | 33.54  |
| 98  | M134_N-Acetylmithine                         | 2.779  | 0.137  | 1.192   | 0.546  |
| 99  | M137_Nicotinic acid                          | BLQ    | BLQ    | BLQ     | BLQ    |
| 100 | M138_N-Methyl-D-aspartic acid                | 870.40 | 99.28  | 956.16  | 129.27 |
| 101 | M140_Ornithine                               | 19.427 | 15.835 | 27.617  | 11.935 |
| 102 | M143_Pantothenic acid#                       | 7.265  | 1.187  | 7.746   | 0.889  |
| 103 | M144_Perfluoroheptanoic acid                 | BLQ    | BLQ    | BLQ     | BLQ    |
| 104 | M145_Phenyllactic acid                       | 269.91 | 34.49  | 288.49  | 45.09  |
| 105 | M146_Phenylpropionic acid                    | BLQ    | BLQ    | BLQ     | BLQ    |
| 106 | M149_4-Hydroxybenzoic acid                   | 0.926  | 0.766  | 0.596   | 0.445  |
| 107 | M150_L-Proline                               | 430.49 | 63.53  | 654.77  | 98.46  |
| 108 | M151_Purine                                  | 0.058  | 0.010  | 0.058   | 0.026  |
| 109 | M152_Pyridoxal 5'-phosphate                  | 4.067  | 1.819  | 2.888   | 1.428  |
| 110 | M153_Pyridoxamine                            | 0.028  | 0.004  | 0.015   | 0.003  |
| 111 | M154_pyridoxine                              | BLQ    | BLQ    | BLQ     | BLQ    |
| 112 | M155_Pyroglutamic acid +M128                 | 12.084 | 3.003  | 14.742  | 4.588  |
| 113 | M157_Flavin Mononucleotide                   | 0.329  | 0.136  | 0.383   | 0.302  |
| 114 | M158_Shikimic acid                           | BLQ    | BLQ    | BLQ     | BLQ    |
| 115 | M160_Sorbitol                                | 95.696 | 26.300 | 139.777 | 53.447 |
| 116 | M161_Taurine                                 | 3055.0 | 182.5  | 3265.9  | 498.6  |
| 117 | M162_Thiamine                                | 7.002  | 2.638  | 2.878   | 0.688  |
| 118 | M163_Thymidine                               | 0.825  | 0.108  | 0.436   | 0.112  |
| 119 | M164_Thymine                                 | 2.014  | 0.223  | 3.104   | 0.299  |
| 120 | M166_Uridine diphosphate-N-acetylglucosamine | 177.68 | 13.87  | 115.14  | 56.92  |
| 121 | M167_Uridine 5'-monophosphate                | 5.330  | 5.601  | 2.751   | 2.038  |
| 122 | M168_Uracil                                  | 301.72 | 49.00  | 339.26  | 56.01  |
| 123 | M169_Uridine                                 | 487.91 | 115.17 | 571.41  | 79.86  |

|     |                                       |         |         |         |         |
|-----|---------------------------------------|---------|---------|---------|---------|
| 124 | M170_Xanthine                         | 312.38  | 43.88   | 303.09  | 42.25   |
| 125 | M171_Xanthosine                       | 6.076   | 1.676   | 7.058   | 2.288   |
| 126 | M172_Xanthylic acid                   | #DIV/0! | #DIV/0! | #DIV/0! | #DIV/0! |
| 127 | M173_Xanthurenic acid                 | 0.027   | 0.013   | 0.020   | 0.017   |
| 128 | M174_Adenosine triphosphate           | 20.041  | 15.950  | 7.126   | 6.692   |
| 129 | M175_Cytidine triphosphate            | BLQ     | BLQ     | BLQ     | BLQ     |
| 130 | M176_Guanosine triphosphate           | 6.108   | 2.812   | 4.141   | 0.999   |
| 131 | M177_Uridine triphosphate             | 1.915   | 0.776   | 1.274   | 0.689   |
| 132 | M178_dATP                             | BLQ     | BLQ     | BLQ     | BLQ     |
| 133 | M179_dCTP                             | BLQ     | BLQ     | BLQ     | BLQ     |
| 134 | M180_dGTP                             | BLQ     | BLQ     | BLQ     | BLQ     |
| 135 | M181_dTTP                             | BLQ     | BLQ     | BLQ     | BLQ     |
| 136 | M182_L-Cysteine                       | 245.29  | 65.47   | 723.48  | 509.06  |
| 137 | M183_L-Alanine                        | 145.43  | 16.90   | 173.60  | 28.29   |
| 138 | M184_L-Asparagine                     | 39.222  | 3.985   | 39.221  | 10.213  |
| 139 | M185_Glycine                          | 15.053  | 8.288   | 17.873  | 12.685  |
| 140 | M186_L-Aspartic acid                  | 279.37  | 20.37   | 250.67  | 46.82   |
| 141 | M187_Argininosuccinic acid            | 4.306   | 0.657   | 4.461   | 0.903   |
| 142 | M188_Sarcosine (s)                    | 817.64  | 88.15   | 825.30  | 76.61   |
| 143 | M189_Dimethylglycine+M191             | 34.291  | 2.827   | 35.750  | 6.657   |
| 144 | M190_Betaine                          | 36.303  | 7.987   | 51.894  | 10.322  |
| 145 | M191_Choline                          | 130.739 | 13.517  | 133.092 | 24.465  |
| 146 | M192_Cystathionine                    | 24.292  | 9.990   | 23.179  | 17.877  |
| 147 | M194_Urea                             | 3527.5  | 406.5   | 4229.4  | 588.4   |
| 148 | M195_Cytidine                         | 3.007   | 1.073   | 2.352   | 0.367   |
| 149 | M196_CDP                              | BLQ     | BLQ     | BLQ     | BLQ     |
| 150 | M197_GDP                              | 3.475   | 1.538   | 2.967   | 1.074   |
| 151 | M198_UDP                              | BLQ     | BLQ     | BLQ     | BLQ     |
| 152 | M200_dCMP                             | 0.334   | 0.166   | 0.486   | 0.056   |
| 153 | M201_dCDP                             | BLQ     | BLQ     | BLQ     | BLQ     |
| 154 | M202_dGMP                             | BLQ     | BLQ     | BLQ     | BLQ     |
| 155 | M203_dGDP                             | 19.05   | 20.52   | 7.44    | 2.37    |
| 156 | M204_dTMP                             | BLQ     | BLQ     | BLQ     | BLQ     |
| 157 | M205_dTDP                             | BLQ     | BLQ     | BLQ     | BLQ     |
| 158 | M206_uridine diphosphate glucose      | 16.549  | 7.608   | 17.744  | 7.090   |
| 159 | M207_ADP-glucose_new                  | 0.593   | 0.193   | 0.825   | 0.380   |
| 160 | M211_Maleic acid_NEG                  | BLQ     | BLQ     | BLQ     | BLQ     |
| 161 | M216_2-Aminobenzoic acid              | 0.018   | 0.026   | 0.010   | 0.006   |
| 162 | M217_p-Aminobenzoic acid              | BLQ     | BLQ     | BLQ     | BLQ     |
| 163 | M219_2-Oxo-4-methylthiobutanoic acid  | BLQ     | BLQ     | BLQ     | BLQ     |
| 164 | M220_2-Pyrocatechuic acid             | BLQ     | BLQ     | BLQ     | BLQ     |
| 165 | M221_L-Dihydroorotic acid             | 64.41   | 22.77   | 63.73   | 13.34   |
| 166 | M224_4-Pyridoxic acid                 | 0.013   | 0.004   | 0.013   | 0.002   |
| 167 | M225_2-Keto-D-gluconic acid           | 0.293   | 0.090   | 0.220   | 0.068   |
| 168 | M226_D-Erythrose 4-phosphate          | 116.24  | 40.33   | 98.90   | 17.68   |
| 169 | M228_Inosine                          | BLQ     | BLQ     | BLQ     | BLQ     |
| 170 | M229_D-Sedoheptulose 7-phosphate      | 80.191  | 32.160  | 50.023  | 6.467   |
| 171 | M230_N-Acetyl-glucosamine 1-phosphate | 40.93   | 13.63   | 59.28   | 30.74   |
| 172 | M231_Cyclic AMP                       | 0.244   | 0.030   | 0.351   | 0.079   |
| 173 | M232_Sucrose                          | 0.298   | 0.175   | 0.564   | 0.498   |
| 174 | M238_Thiamine pyrophosphate           | BLQ     | BLQ     | BLQ     | BLQ     |
| 175 | M239_Adenosine phosphosulfate         | BLQ     | BLQ     | BLQ     | BLQ     |
| 176 | M241_Cholesterol sulfate              | 7.079   | 3.517   | 8.418   | 4.468   |
| 177 | M242_Citicoline                       | 42.62   | 19.02   | 24.82   | 19.09   |
| 178 | M243_Taurodeoxycholic acid            | BLQ     | BLQ     | BLQ     | BLQ     |
| 179 | M245_Coenzyme A                       | 4.024   | 1.789   | 0.992   | 0.799   |
| 180 | M246_Propionyl-CoA                    | 0.008   | 0.001   | 0.003   | 0.002   |
| 181 | M247_3-Hydroxybutyryl-CoA             | BLQ     | BLQ     | BLQ     | BLQ     |
| 182 | M248_L-2-Hydroxyglutaric acid         | 9.814   | 4.139   | 10.942  | 2.173   |
| 183 | M249_Ethanolamine                     | 129.16  | 37.90   | 77.36   | 24.76   |
| 183 | M249_Ethanolamine_new                 | 156.48  | 46.36   | 77.32   | 25.70   |
| 184 | M251_Gamma-Aminobutyric acid          | 5.454   | 0.983   | 5.336   | 1.785   |
| 185 | M254_Creatinine                       | 9.993   | 10.026  | 5.315   | 0.689   |

|         |                                                                                     |         |         |        |        |
|---------|-------------------------------------------------------------------------------------|---------|---------|--------|--------|
| 186     | M255_Creatine (s)                                                                   | 1143.39 | 1200.07 | 574.08 | 92.33  |
| 187     | M256_N-Acetylputrescine                                                             | 0.178   | 0.096   | 0.259  | 0.056  |
| 188     | M257_4-Hydroxyproline(s)                                                            | 8.543   | 2.065   | 7.117  | 1.688  |
| 189     | M258_Adenine                                                                        | 1.298   | 0.659   | 0.712  | 0.209  |
| 190     | M259_L-Homocysteine                                                                 | 23.18   | 14.10   | 116.01 | 49.86  |
| 191     | M260_L-Histidinol                                                                   | BLQ     | BLQ     | BLQ    | BLQ    |
| 192     | M262_Phosphorylcholine                                                              | 861.95  | 113.96  | 743.24 | 140.33 |
| 193     | M264_N-Acetylglutamine                                                              | 0.235   | 0.031   | 0.259  | 0.039  |
| 194     | M265_N-Acetylglutamic acid                                                          | 1.952   | 0.260   | 2.357  | 0.566  |
| 195     | M266_Asymmetric dimethylarginine                                                    | 5.338   | 0.735   | 6.138  | 2.318  |
| 196     | M267_L-Cystine#                                                                     | 0.072   | 0.048   | 6.003  | 8.114  |
| 197     | M268_Deoxyadenosine (s)                                                             | 0.093   | 0.044   | 0.020  | 0.011  |
| 198     | M269_AICA-riboside                                                                  | 0.026   | 0.004   | 0.053  | 0.027  |
| 199     | M271_7-Methylguanosine                                                              | BLQ     | BLQ     | BLQ    | BLQ    |
| 200     | M272_beta-nicotinamide D-ribonucleotide                                             | 0.020   | 0.006   | 0.009  | 0.005  |
| 201     | M273_Riboflavin                                                                     | 0.396   | 0.093   | 0.655  | 0.376  |
| 202     | M276_3,5-Diiodothyronine#                                                           | BLQ     | BLQ     | BLQ    | BLQ    |
| 203     | M277_Putrescine                                                                     | 19.309  | 6.516   | 14.988 | 3.664  |
| 204     | M278_Spermidine                                                                     | 46.98   | 14.69   | 68.72  | 19.32  |
| 205     | M279_Spermine                                                                       | 62.17   | 19.48   | 87.20  | 39.27  |
| 206     | M281_Alpha-Hydroxyisobutyric acid                                                   | BLQ     | BLQ     | BLQ    | BLQ    |
| 207     | M282_4-Hydroxyphenyl acetic acid                                                    | BLQ     | BLQ     | BLQ    | BLQ    |
| 208     | M289_Dimethylamine                                                                  | BLQ     | BLQ     | BLQ    | BLQ    |
| 209     | M290_Glycocholic acid                                                               | BLQ     | BLQ     | BLQ    | BLQ    |
| 210–212 | M291_Glycoursodeoxycholic acid +M297 Glycodeoxycolic acid+M313 Glycochendeoxychlate | BLQ     | BLQ     | BLQ    | BLQ    |
| 213     | M293_Hippurate                                                                      | 1.031   | 0.588   | 1.050  | 0.947  |
| 214–216 | M294_Hyodeoxycholic acid same as M284_Chenodeoxycholic acid M303_NEG                | BLQ     | BLQ     | BLQ    | BLQ    |
| 217–218 | M297 Glycodeoxycolic acid+M313 Glycochendeoxychlate                                 | BLQ     | BLQ     | BLQ    | BLQ    |
| 219     | M299_Taurochenodesoxycholic acid                                                    | BLQ     | BLQ     | BLQ    | BLQ    |
| 220     | M300_Taurocholic acid                                                               | 0.053   | 0.035   | 0.098  | 0.030  |
| 221     | M302_Taurolithocholic acid                                                          | BLQ     | BLQ     | BLQ    | BLQ    |
| 222     | M303_Ursodeoxycholic acid                                                           | BLQ     | BLQ     | BLQ    | BLQ    |
| 223     | M306_Thiamine monophosphate                                                         | BLQ     | BLQ     | BLQ    | BLQ    |
| 224     | M307_2'-Deoxyguanosine                                                              | 1.060   | 0.255   | 0.971  | 0.339  |
| 225     | M308_Malonyl CoA                                                                    | 0.021   | 0.027   | 0.003  | 0.001  |
| 226     | M309_R-2-Hydroxy-2-phenylpropionic acid                                             | BLQ     | BLQ     | BLQ    | BLQ    |
| 227     | M310_D-Citramalic acid                                                              | BLQ     | BLQ     | BLQ    | BLQ    |
| 228     | M311_L-Homocysteic acid                                                             | BLQ     | BLQ     | BLQ    | BLQ    |
| 229     | M312_Serine                                                                         | 315.55  | 28.78   | 287.36 | 45.71  |
| 230     | M314_CDP-ethanolamine                                                               | 22.201  | 7.006   | 25.850 | 5.831  |
| 231     | M315_p-cresyl sulfate                                                               | 0.014   | 0.005   | 0.011  | 0.009  |
| 232     | M316_Glycolithocholic acid                                                          | BLQ     | BLQ     | BLQ    | BLQ    |
| 233     | M317_Dihydro thymine                                                                | BLQ     | BLQ     | BLQ    | BLQ    |
| 234     | M318_Alpha-N-Phenylacetyl- L-glutamine                                              | BLQ     | BLQ     | BLQ    | BLQ    |
| 235     | M319_N-Phenylacetyl glycine                                                         | 0.056   | 0.036   | 0.058  | 0.061  |
| 236     | M327_Lithocholic acid_ss                                                            | BLQ     | BLQ     | BLQ    | BLQ    |
| 237     | M328_Linoleyl Carnitine                                                             | 1.813   | 0.457   | 2.844  | 1.545  |
| 238     | M329_Valeryl-L carnitine                                                            | 1.590   | 0.650   | 1.386  | 0.141  |
| 239     | M330_Lauroyl-L carnitine                                                            | 0.023   | 0.004   | 0.069  | 0.034  |
| 240     | M331_Palmitoyl-L carnitine                                                          | 1.200   | 0.575   | 2.145  | 0.852  |
| 241     | M341_Myristoyl-L-carnitine                                                          | 0.052   | 0.035   | 0.139  | 0.044  |
| 242     | M342_Propionyl-L-carnitine                                                          | 0.551   | 0.133   | 0.693  | 0.173  |
| 243     | M343_Octanoyl-L-carnitine                                                           | 0.016   | 0.008   | 0.035  | 0.011  |
| 244     | M344_Decanoyl-L-carnitine                                                           | 0.014   | 0.001   | 0.110  | 0.085  |
| 245     | M345_Malonyl-L-carnitine                                                            | 0.257   | 0.200   | 0.134  | 0.116  |
| 246     | M346_Stearoyl-L-carnitine                                                           | 1.406   | 0.774   | 3.067  | 1.375  |
| 247     | M351_6-phosphogluconate                                                             | 197.83  | 75.67   | 259.35 | 91.81  |
| 248     | M352_GAR                                                                            | BLQ     | BLQ     | BLQ    | BLQ    |

Note: BLD means Below the limit of detection.

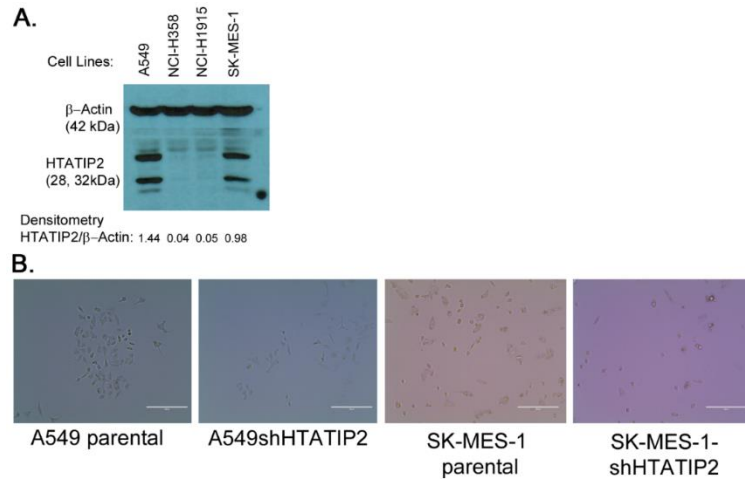

**Figure S1.** Expression of HTATIP2 Protein in A549, NCI-H358, NCI-H1915 and SK-MES-1 Cell Lines and Viability of HTATIP2 Knockdown Cell Lines. **(A).** Expression of HTATIP2 protein in A549, NCI-H358, NCI-H1915 and SK-MES-1 cell lines. Western blot images were quantified using the densitometric analysis. Relative immunoreactive band intensities are expressed as the ratio of the densitometric values for individual bands to the densitometric values for  $\beta$ -actin in the same lane. **(B).** Microscopic examination of the morphology of A549 and SK-MES-1 cells in culture after the cells were transduced with shRNA targeting HTATIP2 (shHTATIP2). Representative micrographs of A549 parental, A549shHTATIP2, SK-MES-1 parental and SK-MES-1-shHTATIP2 cell lines. Original magnifications,  $\times 200$ . Scale bar, 200  $\mu$ m.

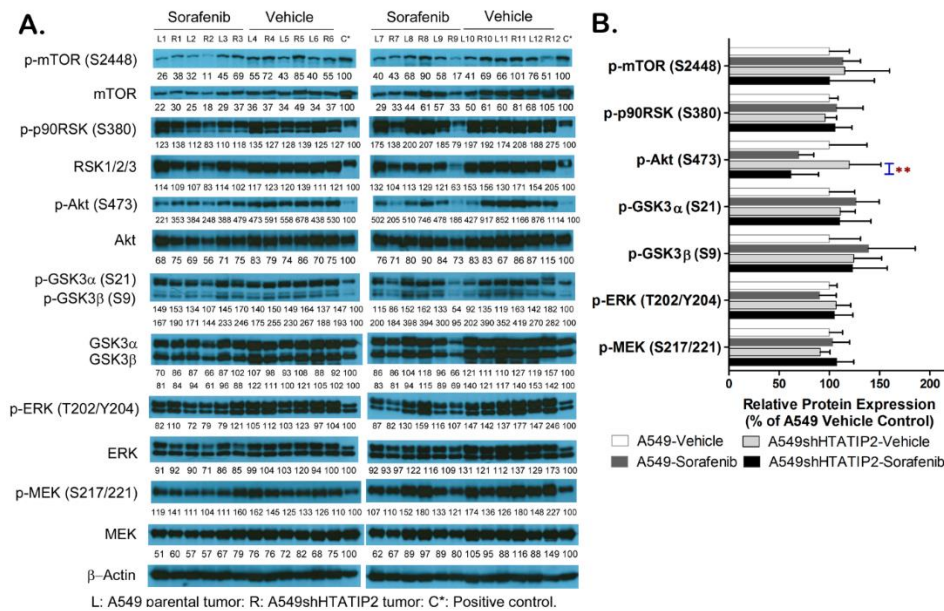

**Figure S2.** The absent expression of HTATIP2 had little impact on the main effectors of the MEK/ERK and Akt signaling pathways. **(A).** Western blot images of the expression of total and phosphorylated mTOR, RSK1/2/3, Akt, GSK3 $\alpha$ /3 $\beta$ , ERK1/2 and MEK1/2 in individual tumor samples. The positive control was used to compensate for both systematic and random errors from SDS-PAGE, membrane transfer, immunoblotting and chemiluminescence detection. **(B).** Quantification of Western blot images using the densitometric analysis. Expression levels of phosphorylated proteins are expressed as the ratio of phosphorylated-to-total species relative to the vehicle control A549 parental tumors. Data are presented as mean  $\pm$  SD. Error bars are SD. **\*\*** $p < 0.01$  compared between vehicle and sorafenib treatment in the same tumor type using the two-sample  $t$  test.

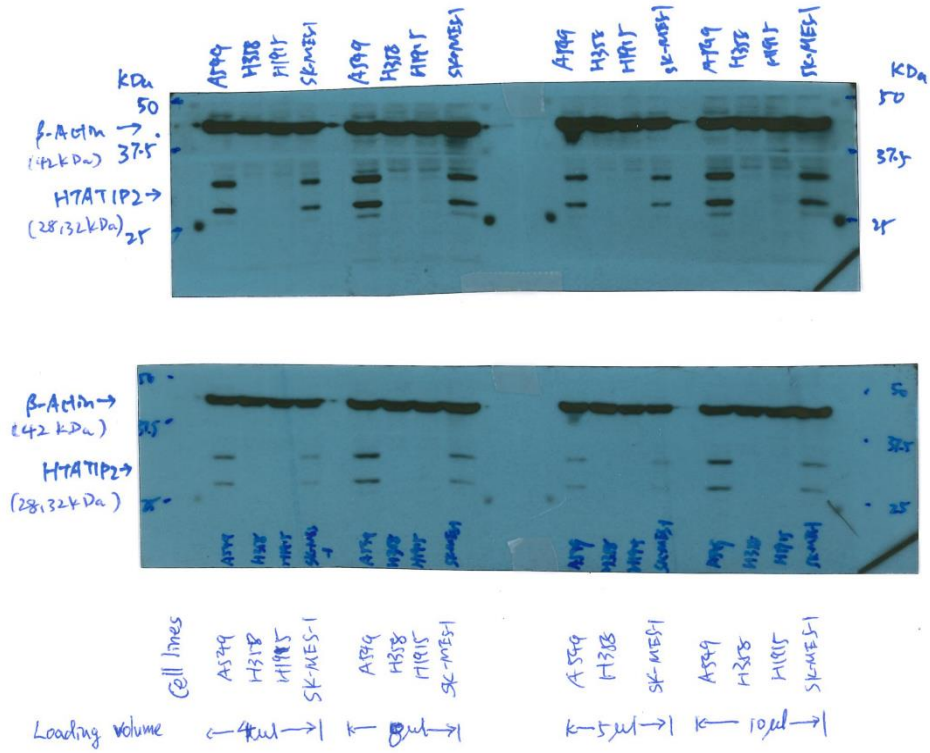

**Supplemental Figure S3-1.** Uncropped Western blot images showing HTATIP2 protein expression in different cell lines including A549, NCI-H358, NCI-H1915 and SK-MES-1 lung cancer cell lines.

**Figure S3.** Uncropped Western blot images.

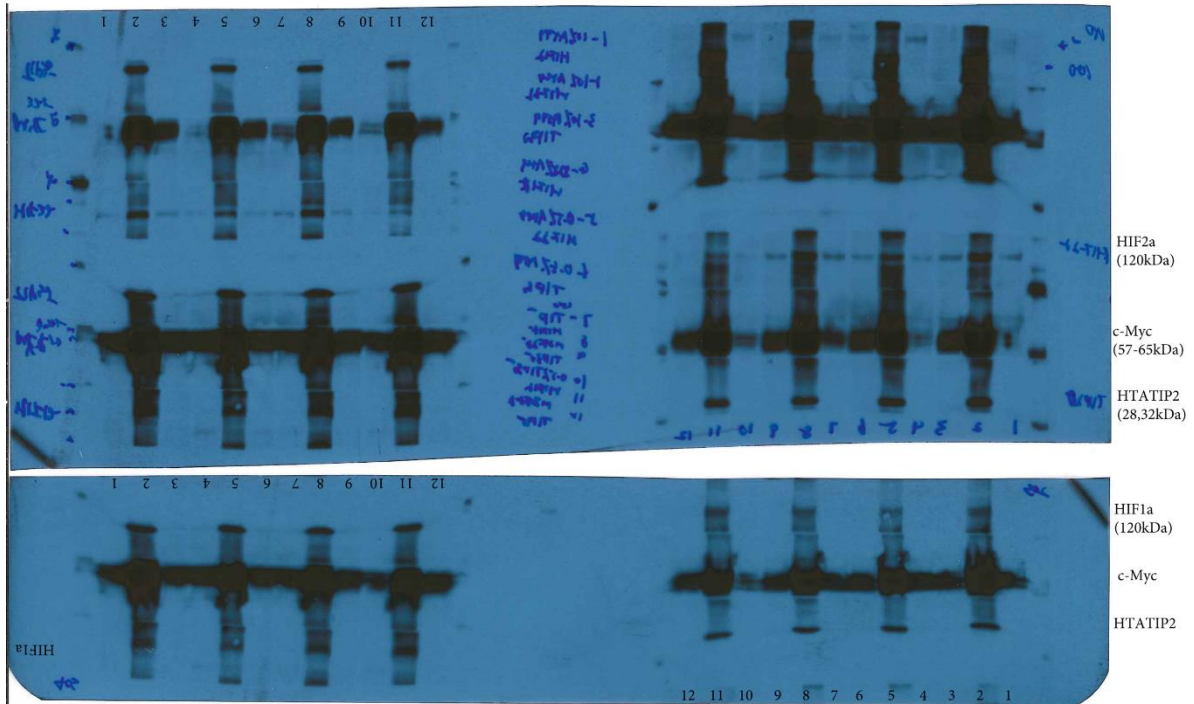

**Supplemental Figure S3-2-1.** Uncropped Western blot images showing the results of the co-immunoprecipitation study. A549 cells were cultured under hypoxic condition (0.5% O<sub>2</sub>) for 24 hours in DMEM/F12 medium supplemented with either 10% or 0.5% FBS. Immunoprecipitation: 1, HIF1a; 2, HIF2a; 3, HTATIP2; 4, HIF1a; 5, HIF2a; 6, HTATIP2; 7, HIF1a; 8, HIF2a; 9, HTATIP2; 10, HIF1a; 11, HIF2a; 12, HTATIP2;





**IN VITRO HTATIP2 knockdown study**

A549shNT versus A549shHTATIP2 cell line under hypoxia (0.5% O<sub>2</sub>) and normoxia condition in the presence and absence of 10  $\mu$ M sorafenib for 24 hours in DMEM containing 0.5% FBS with high glucose and L-glutamine and without sodium pyruvate. Samples were from three independent experiments [E1, E2 and E3]  
 From Left to Right:

(#1 ~4) A549shNT: Normoxia\_control (NC), Normoxia\_sorafenib (NS), Hypoxia\_control (HC), Hypoxia\_sorafenib (HS); (#5 ~8) A549shHTATIP2: Normoxia\_control (NC), Normoxia\_sorafenib (NS), Hypoxia\_control (HC), Hypoxia\_sorafenib (HS); #9: positive control.

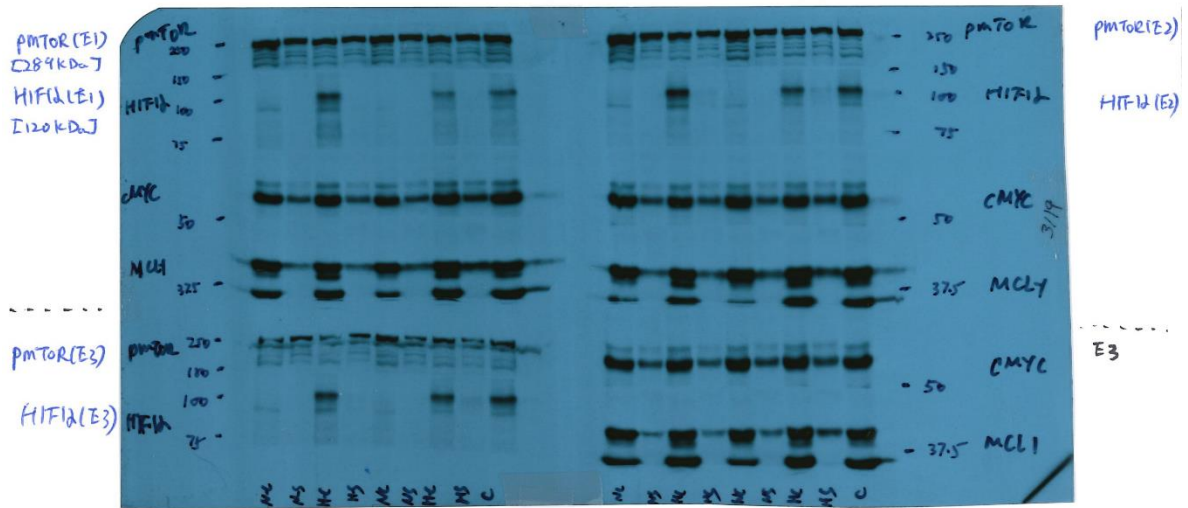

**Supplemental Figure S3-3-1.** Uncropped Western blot images showing the expression of phospho-mTOR (S2448; 289 kDa) and HIF1 $\alpha$  (120 kDa) in A549shNT and A549shHTATIP2 cell lysates.

**IN VITRO HTATIP2 knockdown study**

A549shNT versus A549shHTATIP2 cell line under hypoxia (0.5% O<sub>2</sub>) and normoxia condition in the presence and absence of 10  $\mu$ M sorafenib for 24 hours in DMEM containing 0.5% FBS with high glucose and L-glutamine and without sodium pyruvate. Samples were from three independent experiments [E1, E2 and E3]

From Left to Right:

(#1 ~4) A549shNT: Normoxia\_control (NC), Normoxia\_sorafenib (NS), Hypoxia\_control (HC), Hypoxia\_sorafenib (HS); (#5 ~8) A549shHTATIP2: Normoxia\_control (NC), Normoxia\_sorafenib (NS), Hypoxia\_control (HC), Hypoxia\_sorafenib (HS); #9: positive control.

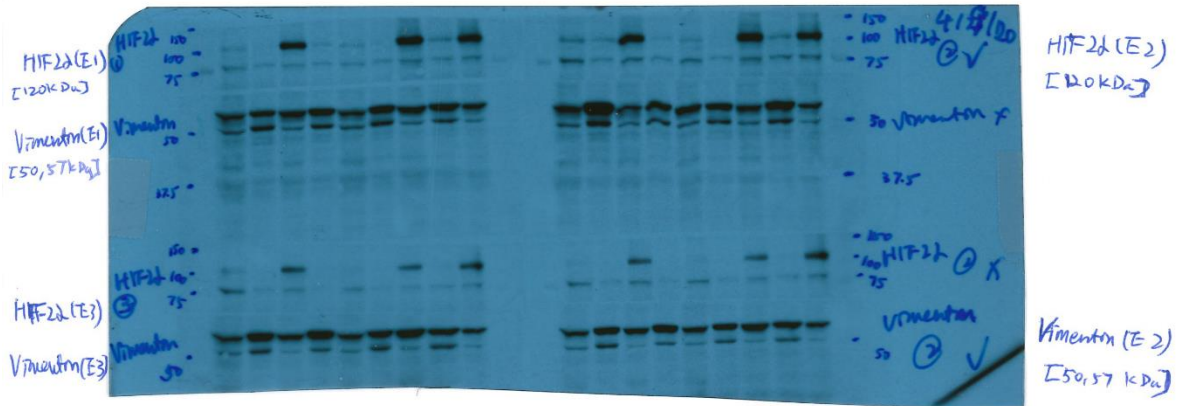

**Supplemental Figure S3-3-2.** Uncropped Western blot images showing the expression of HIF2 $\alpha$  (120 kDa) and Vimentin (50, 57 kDa) in A549shNT and A549shHTATIP2 cell lysates.

**IN VITRO HTATIP2 knockdown study**

A549shNT versus A549shHTATIP2 cell line under hypoxia (0.5% O<sub>2</sub>) and normoxia condition in the presence and absence of 10 μM sorafenib for 24 hours in DMEM containing 0.5% FBS with high glucose and L-glutamine and without sodium pyruvate. Samples were from three independent experiments [E1, E2 and E3]

From Left to Right:

(#1 ~4) A549shNT: Normoxia\_control (NC), Normoxia\_sorafenib (NS), Hypoxia\_control (HC), Hypoxia\_sorafenib (HS); (#5 ~8) A549shHTATIP2: Normoxia\_control (NC), Normoxia\_sorafenib (NS), Hypoxia\_control (HC), Hypoxia\_sorafenib (HS); #9: positive control.

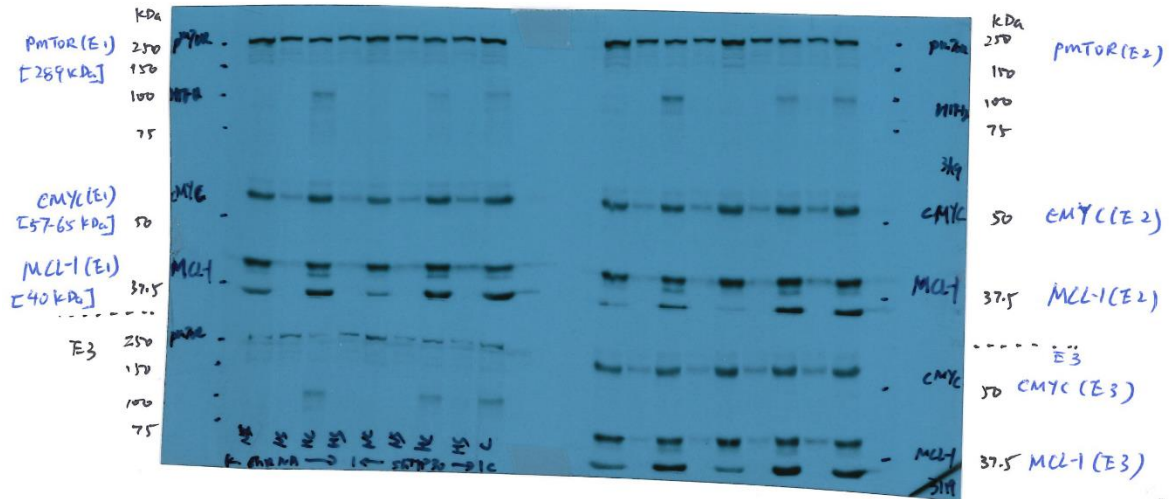

**Supplemental Figure S3-3-3.** Uncropped Western blot images showing the expression of phospho-mTOR (S2448; 289 kDa), c-Myc (57~65 kDa) and MCL-1 (40 kDa) in A549shNT and A549shHTATIP2 cell lysates.

**IN VITRO HTATIP2 knockdown study**

A549shNT versus A549shHTATIP2 cell line under hypoxia (0.5% O<sub>2</sub>) and normoxia condition in the presence and absence of 10 μM sorafenib for 24 hours in DMEM containing 0.5% FBS with high glucose and L-glutamine and without sodium pyruvate. Samples were from three independent experiments [E1, E2 and E3]

From Left to Right:

(#1 ~4) A549shNT: Normoxia\_control (NC), Normoxia\_sorafenib (NS), Hypoxia\_control (HC), Hypoxia\_sorafenib (HS); (#5 ~8) A549shHTATIP2: Normoxia\_control (NC), Normoxia\_sorafenib (NS), Hypoxia\_control (HC), Hypoxia\_sorafenib (HS); #9: positive control.

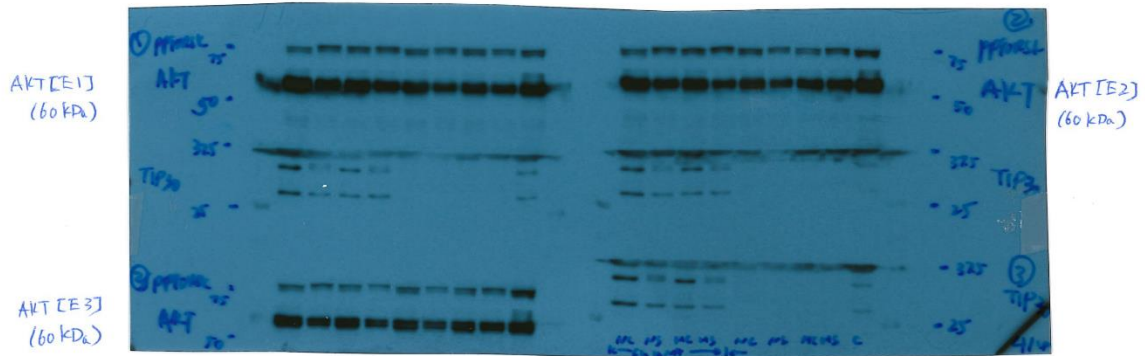

**Supplemental Figure S3-3-4.** Uncropped Western blot images showing the expression of Akt (60 kDa) in A549shNT and A549shHTATIP2 cell lysates.

**IN VITRO HTATIP2 knockdown study**

A549shNT versus A549shHTATIP2 cell line under hypoxia (0.5% O<sub>2</sub>) and normoxia condition in the presence and absence of 10 μM sorafenib for 24 hours in DMEM containing 0.5% FBS with high glucose and L-glutamine and without sodium pyruvate. Samples were from three independent experiments [E1, E2 and E3]

From Left to Right:

(#1 ~4) A549shNT: Normoxia\_control (NC), Normoxia\_sorafenib (NS), Hypoxia\_control (HC), Hypoxia\_sorafenib (HS); (#5 ~8) A549shHTATIP2: Normoxia\_control (NC), Normoxia\_sorafenib (NS), Hypoxia\_control (HC), Hypoxia\_sorafenib (HS); #9: positive control.

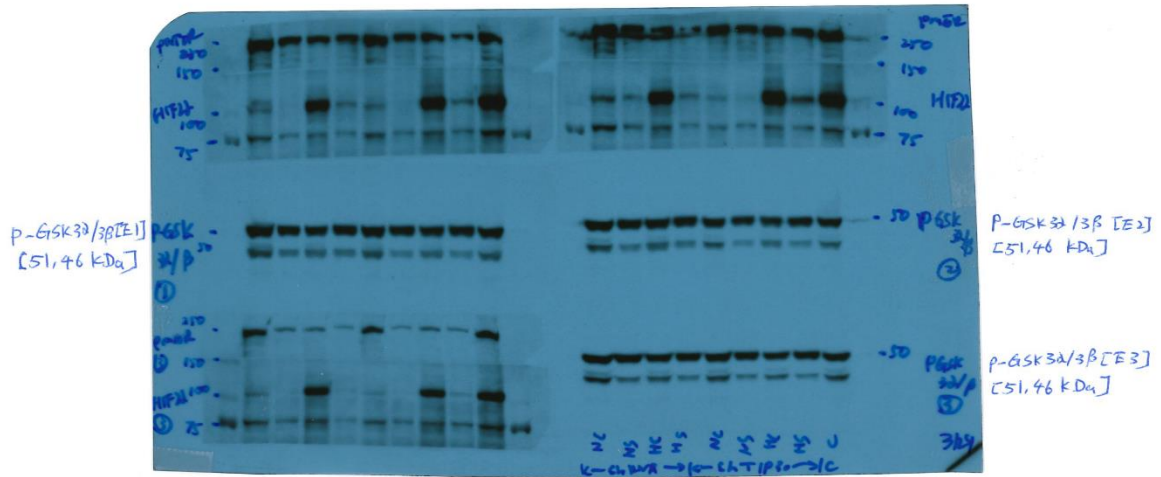

**Supplemental Figure S3-3-5.** Uncropped Western blot images showing the expression of phospho-GSK3α/3β (S21/S9; 51, 46 kDa) in A549shNT and A549shHTATIP2 cell lysates.

**IN VITRO HTATIP2 knockdown study**

A549shNT versus A549shHTATIP2 cell line under hypoxia (0.5% O<sub>2</sub>) and normoxia condition in the presence and absence of 10  $\mu$ M sorafenib for 24 hours in DMEM containing 0.5% FBS with high glucose and L-glutamine and without sodium pyruvate. Samples were from three independent experiments [E1, E2 and E3] From Left to Right:

(#1 ~4) A549shNT: Normoxia\_control (NC), Normoxia\_sorafenib (NS), Hypoxia\_control (HC), Hypoxia\_sorafenib (HS); (#5 ~8) A549shHTATIP2: Normoxia\_control (NC), Normoxia\_sorafenib (NS), Hypoxia\_control (HC), Hypoxia\_sorafenib (HS); #9: positive control.

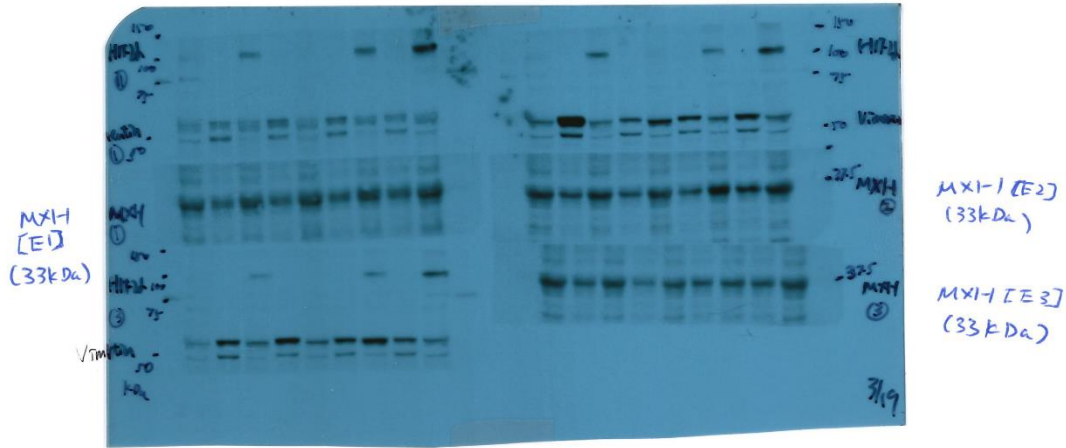

**Supplemental Figure S3-3-6.** Uncropped Western blot images showing the expression of MXI1 (33 kDa) in A549shNT and A549shHTATIP2 cell lysates.

**IN VITRO HTATIP2 knockdown study**

A549shNT versus A549shHTATIP2 cell line under hypoxia (0.5% O<sub>2</sub>) and normoxia condition in the presence and absence of 10  $\mu$ M sorafenib for 24 hours in DMEM containing 0.5% FBS with high glucose and L-glutamine and without sodium pyruvate. Samples were from three independent experiments [E1, E2 and E3]

From Left to Right:

(#1 ~4) A549shNT: Normoxia\_control (NC), Normoxia\_sorafenib (NS), Hypoxia\_control (HC), Hypoxia\_sorafenib (HS); (#5 ~8) A549shHTATIP2: Normoxia\_control (NC), Normoxia\_sorafenib (NS), Hypoxia\_control (HC), Hypoxia\_sorafenib (HS); #9: positive control.

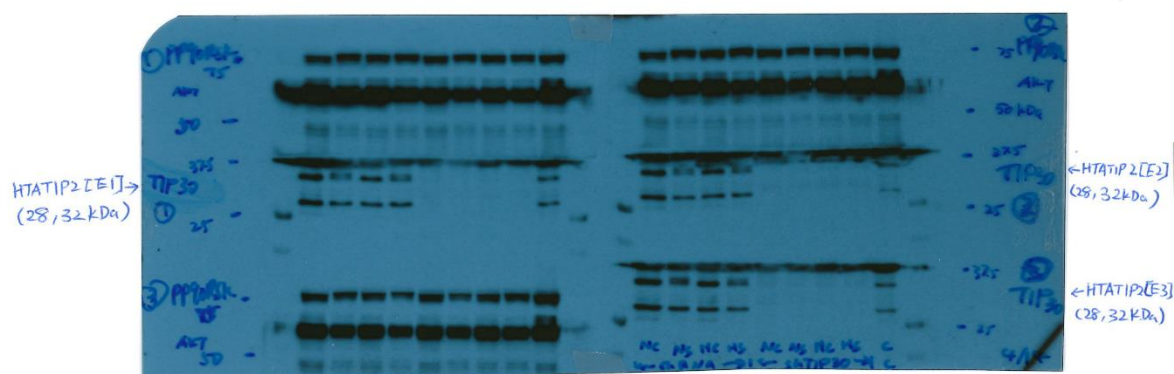

**Supplemental Figure S3-3-7.** Uncropped Western blot images showing the expression of HTATIP2 (28, 32 kDa) in A549shNT and A549shHTATIP2 cell lysates.



**IN VITRO HTATIP2 knockdown study**

A549shNT versus A549shHTATIP2 cell line under hypoxia (0.5% O<sub>2</sub>) and normoxia condition in the presence and absence of 10  $\mu$ M sorafenib for 24 hours in DMEM containing 0.5% FBS with high glucose and L-glutamine and without sodium pyruvate. Samples were from three independent experiments [E1, E2 and E3]  
 From Left to Right:

(#1 ~4) A549shNT: Normoxia\_control (NC), Normoxia\_sorafenib (NS), Hypoxia\_control (HC), Hypoxia\_sorafenib (HS); (#5 ~8) A549shHTATIP2: Normoxia\_control (NC), Normoxia\_sorafenib (NS), Hypoxia\_control (HC), Hypoxia\_sorafenib (HS); #9: positive control.

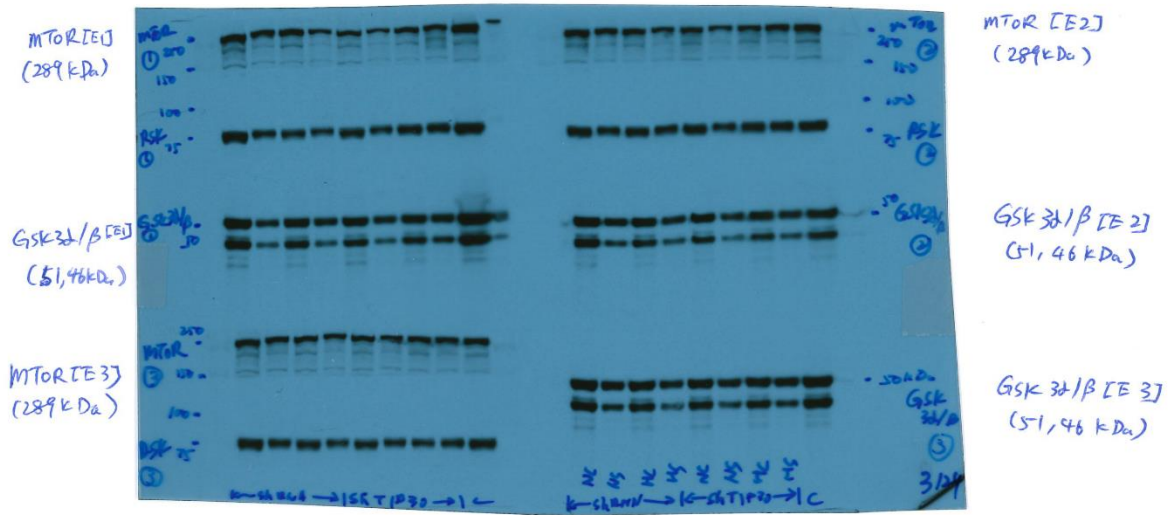

**Supplemental Figure S3-3-8.** Uncropped Western blot images showing the expression of mTOR (289 kDa) and GSK3 $\alpha/\beta$  (51, 46 kDa) in A549shNT and A549shHTATIP2 cell lysates.

**IN VITRO HTATIP2 knockdown study**

A549shNT versus A549shHTATIP2 cell line under hypoxia (0.5% O<sub>2</sub>) and normoxia condition in the presence and absence of 10 μM sorafenib for 24 hours in DMEM containing 0.5% FBS with high glucose and L-glutamine and without sodium pyruvate. Samples were from three independent experiments [E1, E2 and E3]

From Left to Right:

(#1 ~4) A549shNT: Normoxia\_control (NC), Normoxia\_sorafenib (NS), Hypoxia\_control (HC), Hypoxia\_sorafenib (HS); (#5 ~8) A549shHTATIP2: Normoxia\_control (NC), Normoxia\_sorafenib (NS), Hypoxia\_control (HC), Hypoxia\_sorafenib (HS); #9: positive control.

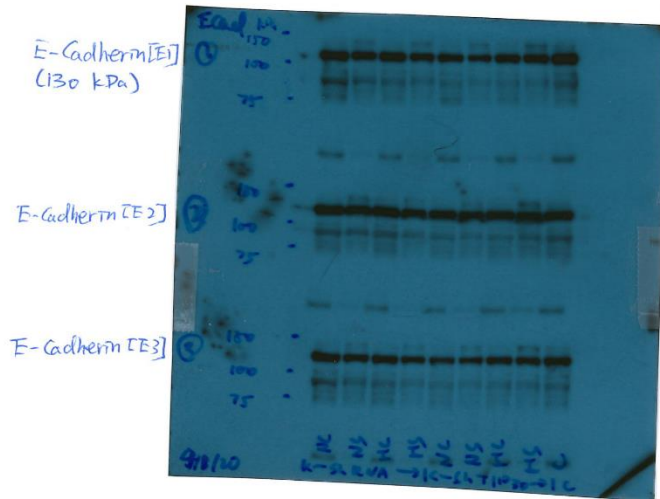

**Supplemental Figure S3-3-9.** Uncropped Western blot images showing the expression of E-Cadherin (130 kDa) in A549shNT and A549shHTATIP2 cell lysates.

**IN VITRO HTATIP2 knockdown study**

A549shNT versus A549shHTATIP2 cell line under hypoxia (0.5% O<sub>2</sub>) and normoxia condition in the presence and absence of 10  $\mu$ M sorafenib for 24 hours in DMEM containing 0.5% FBS with high glucose and L-glutamine and without sodium pyruvate. Samples were from three independent experiments [E1, E2 and E3]

From Left to Right:

(#1 ~4) A549shNT: Normoxia\_control (NC), Normoxia\_sorafenib (NS), Hypoxia\_control (HC), Hypoxia\_sorafenib (HS); (#5 ~8) A549shHTATIP2: Normoxia\_control (NC), Normoxia\_sorafenib (NS), Hypoxia\_control (HC), Hypoxia\_sorafenib (HS); #9: positive control.

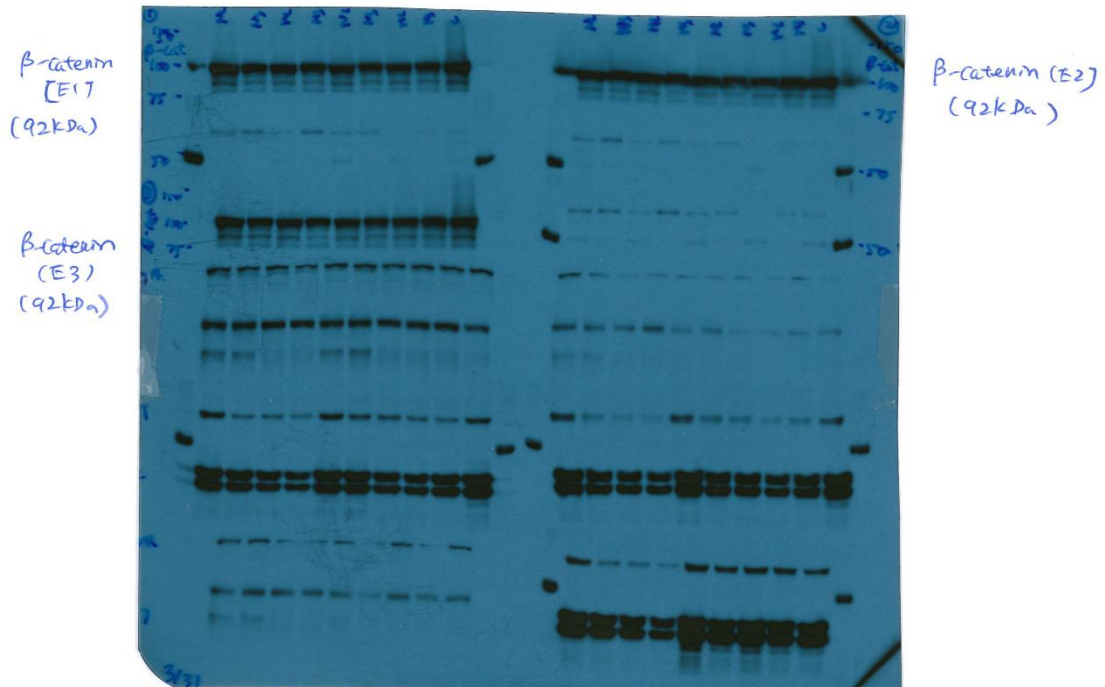

**Supplemental Figure S3-3-10.** Uncropped Western blot images showing the expression of  $\beta$ -Catenin (92 kDa) in A549shNT and A549shHTATIP2 cell lysates.

**IN VITRO HTATIP2 knockdown study**

A549shNT versus A549shHTATIP2 cell line under hypoxia (0.5% O<sub>2</sub>) and normoxia condition in the presence and absence of 10  $\mu$ M sorafenib for 24 hours in DMEM containing 0.5% FBS with high glucose and L-glutamine and without sodium pyruvate. Samples were from three independent experiments [E1, E2 and E3]  
From Left to Right:

(#1 ~4) A549shNT: Normoxia\_control (NC), Normoxia\_sorafenib (NS), Hypoxia\_control (HC), Hypoxia\_sorafenib (HS); (#5 ~8) A549shHTATIP2: Normoxia\_control (NC), Normoxia\_sorafenib (NS), Hypoxia\_control (HC), Hypoxia\_sorafenib (HS); #9: positive control.

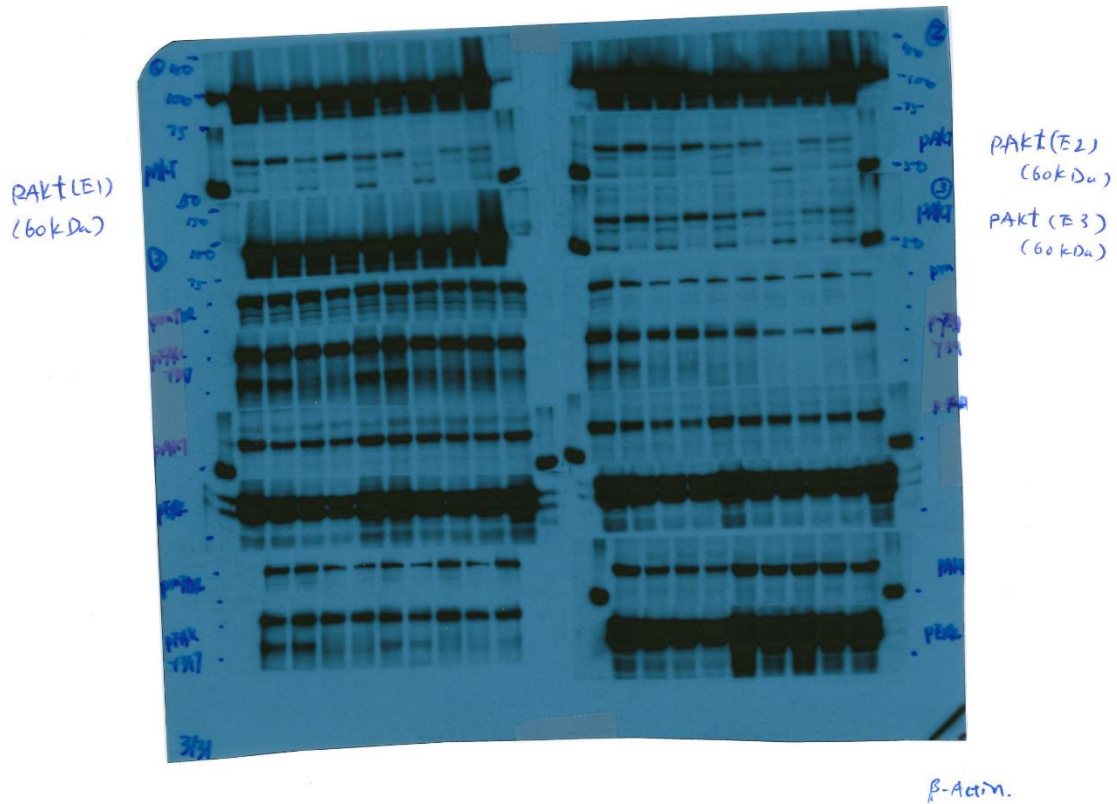

**Supplemental Figure S3-3-11.** Uncropped Western blot images showing the expression of phospho-Akt (S473; 60 kDa) in A549shNT and A549shHTATIP2 cell lysates.

**IN VITRO HTATIP2 knockdown study**

A549shNT versus A549shHTATIP2 cell line under hypoxia (0.5% O<sub>2</sub>) and normoxia condition in the presence and absence of 10  $\mu$ M sorafenib for 24 hours in DMEM containing 0.5% FBS with high glucose and L-glutamine and without sodium pyruvate. Samples were from three independent experiments [E1, E2 and E3]

From Left to Right:

(#1 ~4) A549shNT: Normoxia\_control (NC), Normoxia\_sorafenib (NS), Hypoxia\_control (HC), Hypoxia\_sorafenib (HS); (#5 ~8) A549shHTATIP2: Normoxia\_control (NC), Normoxia\_sorafenib (NS), Hypoxia\_control (HC), Hypoxia\_sorafenib (HS); #9: positive control.

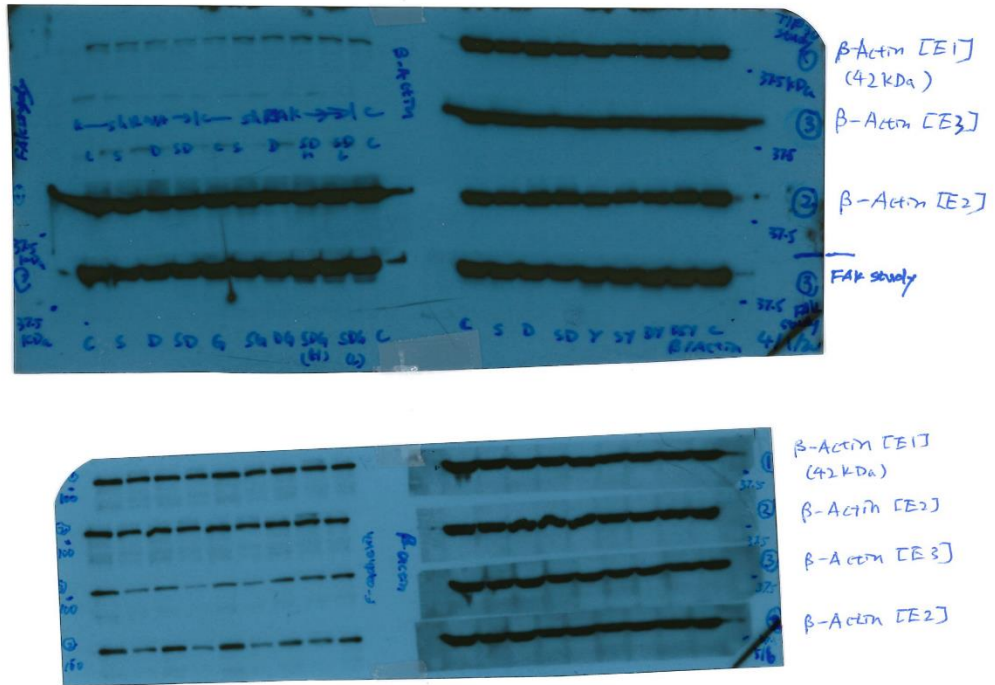

**Supplemental Figure S3-3-12.** Uncropped Western blot images showing the expression of  $\beta$ -Actin (42 kDa) in A549shNT and A549shHTATIP2 cell lysates.

**HTATIP2 knockdown *IN VIVO* study**

Mouse ID: Sorafenib group: #1-1, #2-1, #3-1, #3-2, #5-1, #5-2.

Control group: #4-1, #4-2, #4-3, #4-4, #6-1, #6-2.

A – A549 parental tumors, T – A549shHTATIP2 tumors

From Left to Right:

Membrane 1: A1-1, T1-1, A2-1, T2-1, A3-1, T3-1, A4-1, T4-1, A4-2, T4-2, A4-3, T4-3, positive control

Membrane 2: A3-2, T3-2, A5-1, T5-1, A5-2, T5-2, A4-4, T4-4, A6-1, T6-1, A6-2, T6-2, positive control

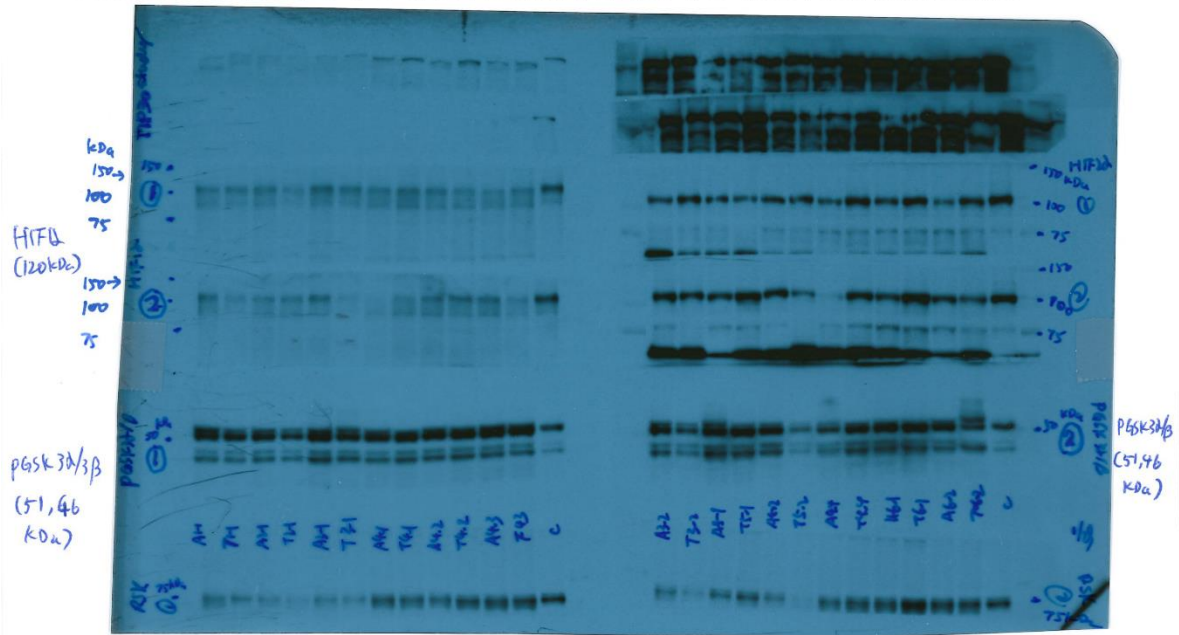

**Supplemental Figure S3-4-1.** Uncropped Western blot images showing the expression of HIF1 $\alpha$  (120 kDa) and phospho-GSK3 $\alpha$ / $\beta$  (S21/S9; 51, 46 kDa) in A549 parental and A549shHTATIP2 tumor homogenates.

**HTATIP2 knockdown *IN VIVO* study**

Mouse ID: Sorafenib group: #1-1, #2-1, #3-1, #3-2, #5-1, #5-2.

Control group: #4-1, #4-2, #4-3, #4-4, #6-1, #6-2.

A – A549 parental tumors, T – A549shHTATIP2 tumors

From Left to Right:

Membrane 1: A1-1, T1-1, A2-1, T2-1, A3-1, T3-1, A4-1, T4-1, A4-2, T4-2, A4-3, T4-3, positive control

Membrane 2: A3-2, T3-2, A5-1, T5-1, A5-2, T5-2, A4-4, T4-4, A6-1, T6-1, A6-2, T6-2, positive control

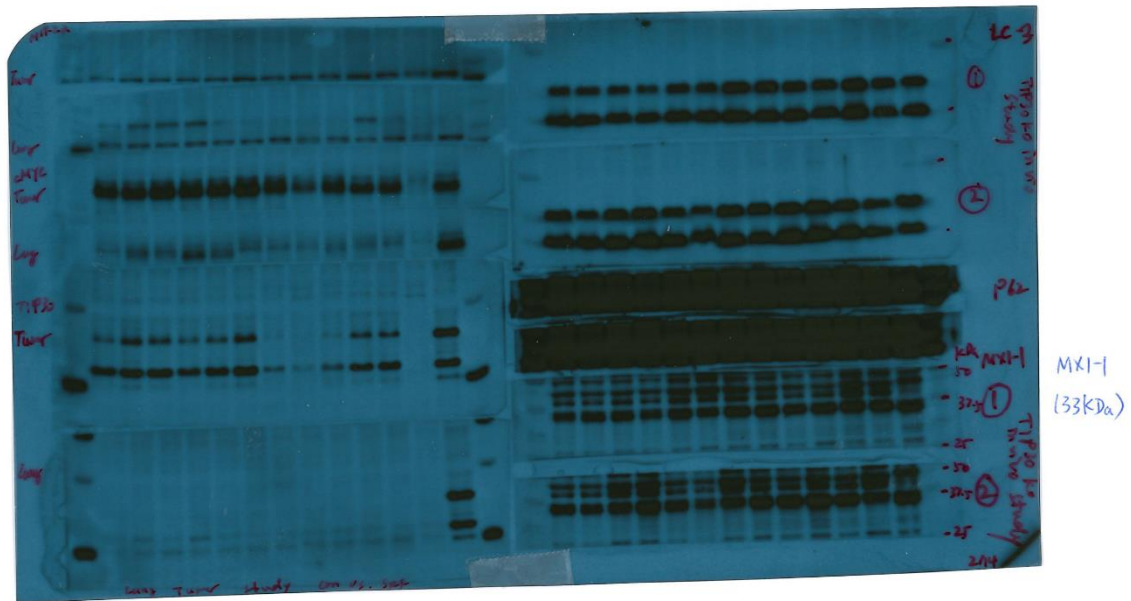

**Supplemental Figure S3-4-2.** Uncropped Western blot images showing the expression of MXI1 (33 kDa) in A549 parental and A549shHTATIP2 tumor homogenates.

**HTATIP2 knockdown *IN VIVO* study**

Mouse ID: Sorafenib group: #1-1, #2-1, #3-1, #3-2, #5-1, #5-2.

Control group: #4-1, #4-2, #4-3, #4-4, #6-1, #6-2.

A – A549 parental tumors, T – A549shHTATIP2 tumors

From Left to Right:

Membrane 1: A1-1, T1-1, A2-1, T2-1, A3-1, T3-1, A4-1, T4-1, A4-2, T4-2, A4-3, T4-3, positive control

Membrane 2: A3-2, T3-2, A5-1, T5-1, A5-2, T5-2, A4-4, T4-4, A6-1, T6-1, A6-2, T6-2, positive control

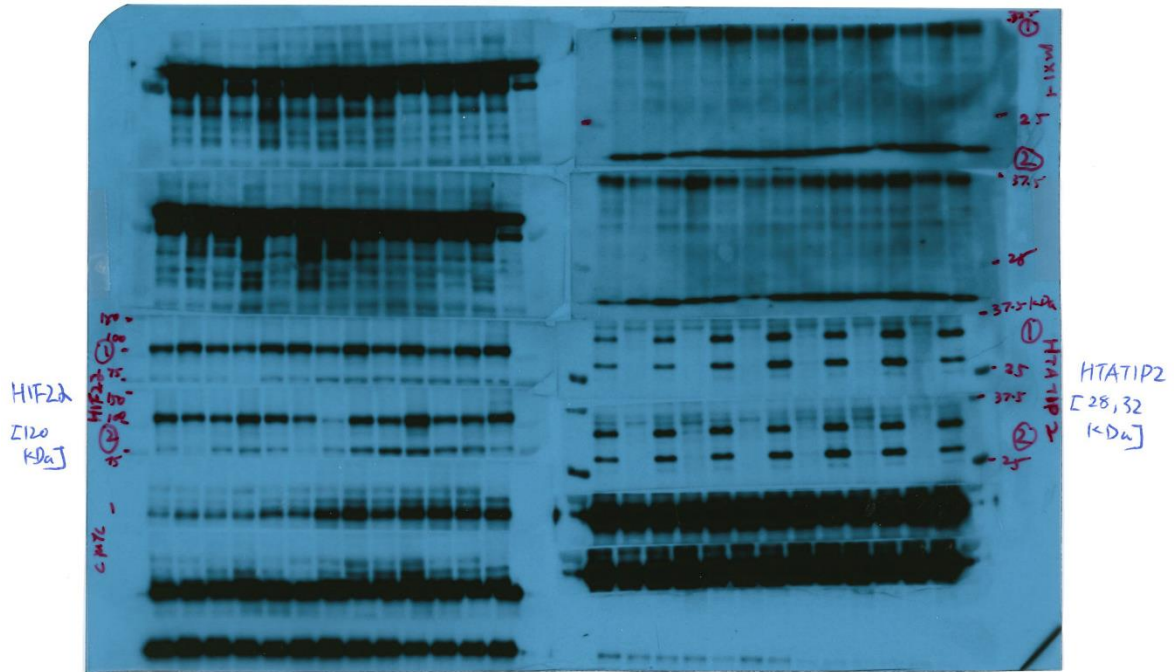

**Supplemental Figure S3-4-3.** Uncropped Western blot images showing the expression of HIF2 $\alpha$  (120 kDa) and HTATIP2 (28, 32 kDa) in A549 parental and A549shHTATIP2 tumor homogenates.



**HTATIP2 knockdown *IN VIVO* study**

Mouse ID: Sorafenib group: #1-1, #2-1, #3-1, #3-2, #5-1, #5-2.

Control group: #4-1, #4-2, #4-3, #4-4, #6-1, #6-2.

A – A549 parental tumors, T – A549shHTATIP2 tumors

From Left to Right:

Membrane 1: A1-1, T1-1, A2-1, T2-1, A3-1, T3-1, A4-1, T4-1, A4-2, T4-2, A4-3, T4-3, positive control

Membrane 2: A3-2, T3-2, A5-1, T5-1, A5-2, T5-2, A4-4, T4-4, A6-1, T6-1, A6-2, T6-2, positive control

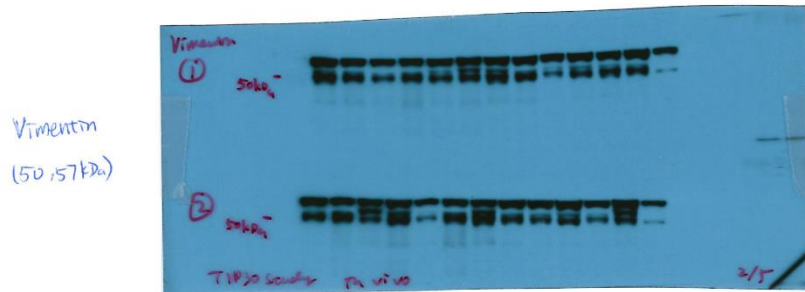

**Supplemental Figure S3-4-4.** Uncropped Western blot images showing the expression of Vimentin (50, 57 kDa) in A549 parental and A549shHTATIP2 tumor homogenates.

**HTATIP2 knockdown *IN VIVO* study**

Mouse ID: Sorafenib group: #1-1, #2-1, #3-1, #3-2, #5-1, #5-2.

Control group: #4-1, #4-2, #4-3, #4-4, #6-1, #6-2.

A – A549 parental tumors, T – A549shHTATIP2 tumors

From Left to Right:

Membrane 1: A1-1, T1-1, A2-1, T2-1, A3-1, T3-1, A4-1, T4-1, A4-2, T4-2, A4-3, T4-3, positive control

Membrane 2: A3-2, T3-2, A5-1, T5-1, A5-2, T5-2, A4-4, T4-4, A6-1, T6-1, A6-2, T6-2, positive control

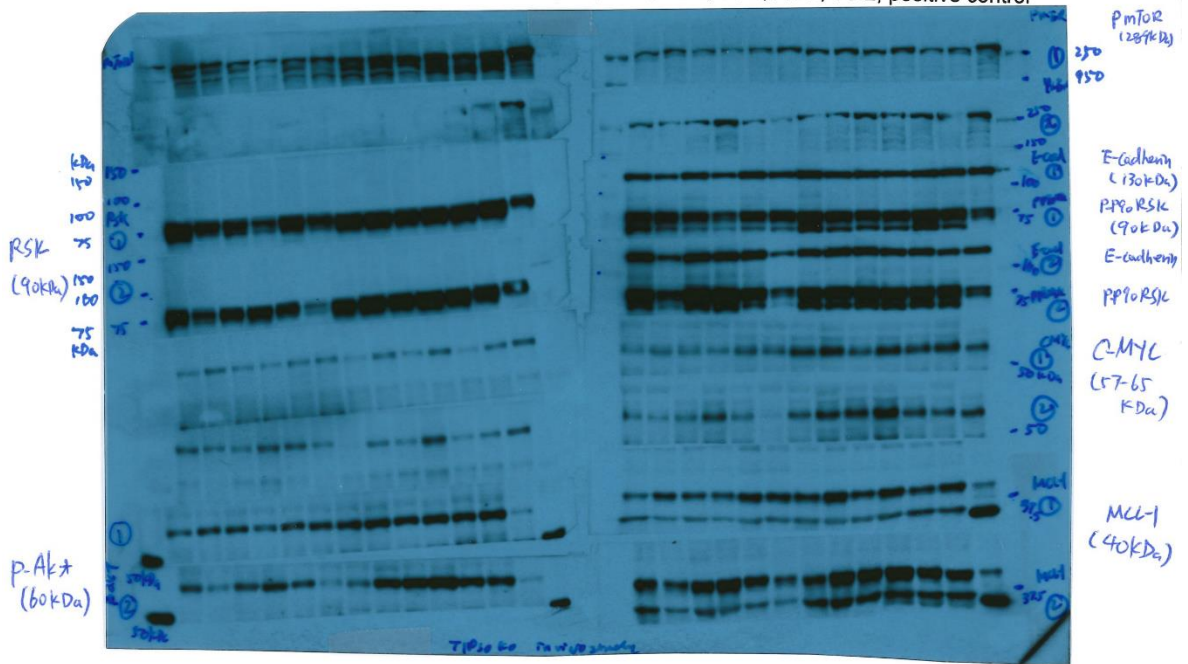

**Supplemental Figure S3-4-5.** Uncropped Western blot images showing the expression of phospho-mTOR (S2448; 289 kDa), E-Cadherin (130 kDa), RSK (90 kDa), phospho-p90RSK (S380; 90 kDa), phospho-Akt (S473; 60 kDa), c-Myc (57 ~ 65 kDa), MCL-1 (40 kDa) in A549 parental and A549shHTATIP2 tumor homogenates.

**HTATIP2 knockdown *IN VIVO* study**

Mouse ID: Sorafenib group: #1-1, #2-1, #3-1, #3-2, #5-1, #5-2.

Control group: #4-1, #4-2, #4-3, #4-4, #6-1, #6-2.

A – A549 parental tumors, T – A549shHTATIP2 tumors

From Left to Right:

Membrane 1: A1-1, T1-1, A2-1, T2-1, A3-1, T3-1, A4-1, T4-1, A4-2, T4-2, A4-3, T4-3, positive control

Membrane 2: A3-2, T3-2, A5-1, T5-1, A5-2, T5-2, A4-4, T4-4, A6-1, T6-1, A6-2, T6-2, positive control

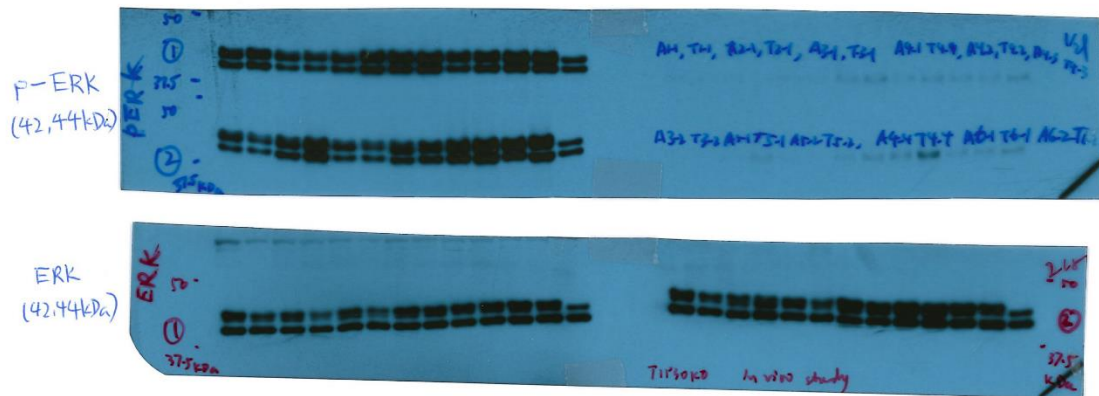

**Supplemental Figure S3-4-6.** Uncropped Western blot images showing the expression of ERK1/2 (42, 44 kDa) and phospho-ERK1/2 (T202/Y204; 42, 44 kDa) in A549 parental and A549shHTATIP2 tumor homogenates.

**HTATIP2 knockdown *IN VIVO* study**

Mouse ID: Sorafenib group: #1-1, #2-1, #3-1, #3-2, #5-1, #5-2.

Control group: #4-1, #4-2, #4-3, #4-4, #6-1, #6-2.

A – A549 parental tumors, T – A549shHTATIP2 tumors

From Left to Right:

Membrane 1: A1-1, T1-1, A2-1, T2-1, A3-1, T3-1, A4-1, T4-1, A4-2, T4-2, A4-3, T4-3, positive control

Membrane 2: A3-2, T3-2, A5-1, T5-1, A5-2, T5-2, A4-4, T4-4, A6-1, T6-1, A6-2, T6-2, positive control

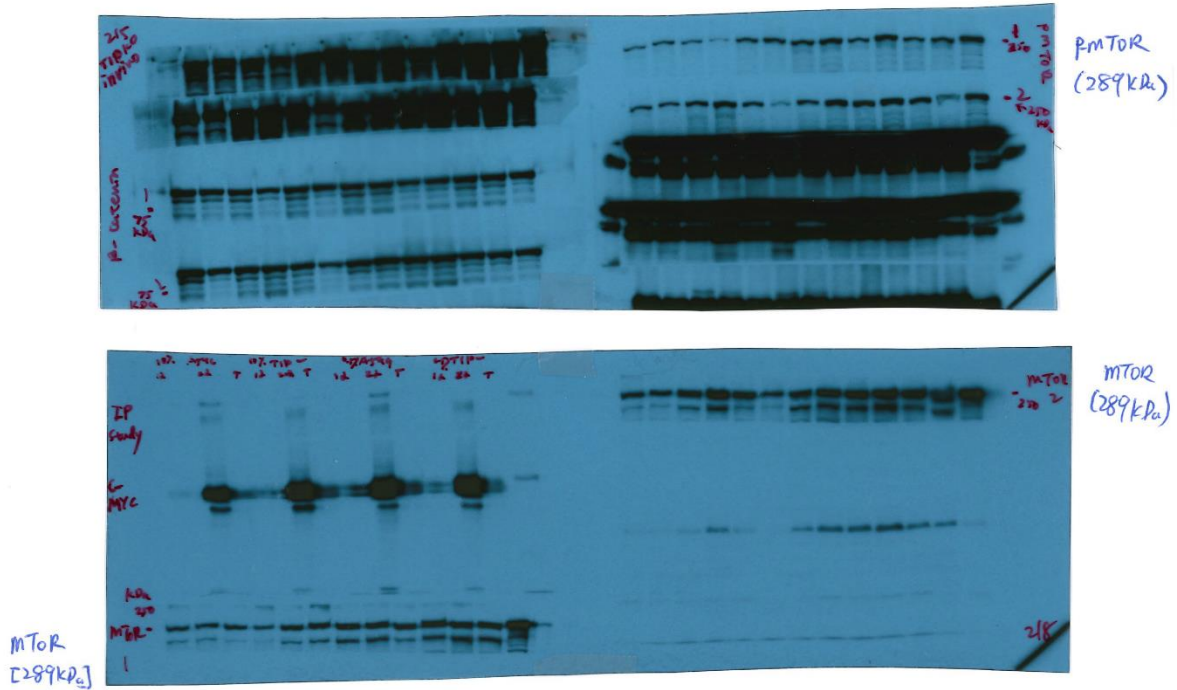

**Supplemental Figure S3-4-7.** Uncropped Western blot images showing the expression of mTOR (289 kDa) and phospho-mTOR (S2448; 289 kDa) in A549 parental and A549shHTATIP2 tumor homogenates.

**HTATIP2 knockdown *IN VIVO* study**

Mouse ID: Sorafenib group: #1-1, #2-1, #3-1, #3-2, #5-1, #5-2.

Control group: #4-1, #4-2, #4-3, #4-4, #6-1, #6-2.

A – A549 parental tumors, T – A549shHTATIP2 tumors

From Left to Right:

Membrane 1: A1-1, T1-1, A2-1, T2-1, A3-1, T3-1, A4-1, T4-1, A4-2, T4-2, A4-3, T4-3, positive control

Membrane 2: A3-2, T3-2, A5-1, T5-1, A5-2, T5-2, A4-4, T4-4, A6-1, T6-1, A6-2, T6-2, positive control

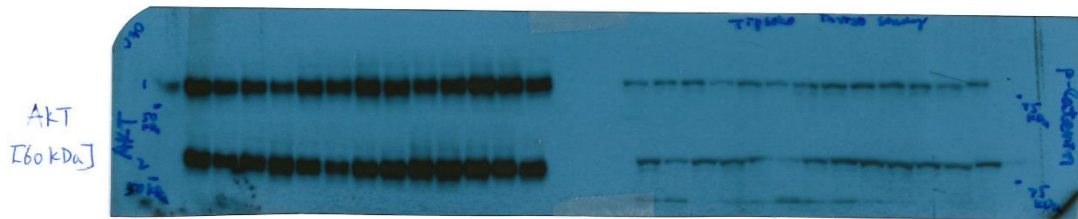

**Supplemental Figure S3-4-8.** Uncropped Western blot images showing the expression of Akt (60 kDa) in A549 parental and A549shHTATIP2 tumor homogenates.

**HTATIP2 knockdown *IN VIVO* study**

Mouse ID: Sorafenib group: #1-1, #2-1, #3-1, #3-2, #5-1, #5-2.

Control group: #4-1, #4-2, #4-3, #4-4, #6-1, #6-2.

A – A549 parental tumors, T – A549shHTATIP2 tumors

From Left to Right:

Membrane 1: A1-1, T1-1, A2-1, T2-1, A3-1, T3-1, A4-1, T4-1, A4-2, T4-2, A4-3, T4-3, positive control

Membrane 2: A3-2, T3-2, A5-1, T5-1, A5-2, T5-2, A4-4, T4-4, A6-1, T6-1, A6-2, T6-2, positive control

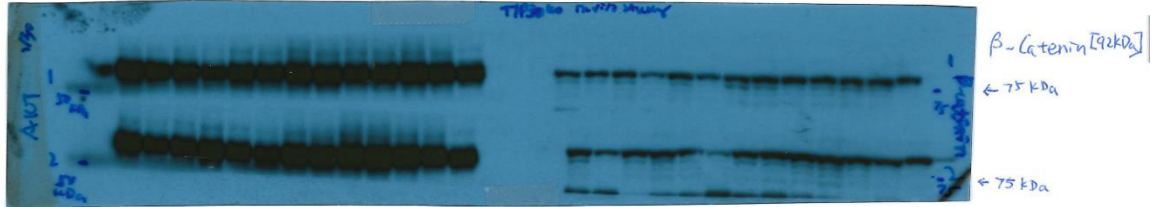

**Supplemental Figure S3-4-9.** Uncropped Western blot images showing the expression of  $\beta$ -Catenin (92 kDa) in A549 parental and A549shHTATIP2 tumor homogenates.

**HTATIP2 knockdown *IN VIVO* study**

Mouse ID: Sorafenib group: #1-1, #2-1, #3-1, #3-2, #5-1, #5-2.

Control group: #4-1, #4-2, #4-3, #4-4, #6-1, #6-2.

A – A549 parental tumors, T – A549shHTATIP2 tumors

From Left to Right:

Membrane 1: A1-1, T1-1, A2-1, T2-1, A3-1, T3-1, A4-1, T4-1, A4-2, T4-2, A4-3, T4-3, positive control

Membrane 2: A3-2, T3-2, A5-1, T5-1, A5-2, T5-2, A4-4, T4-4, A6-1, T6-1, A6-2, T6-2, positive control

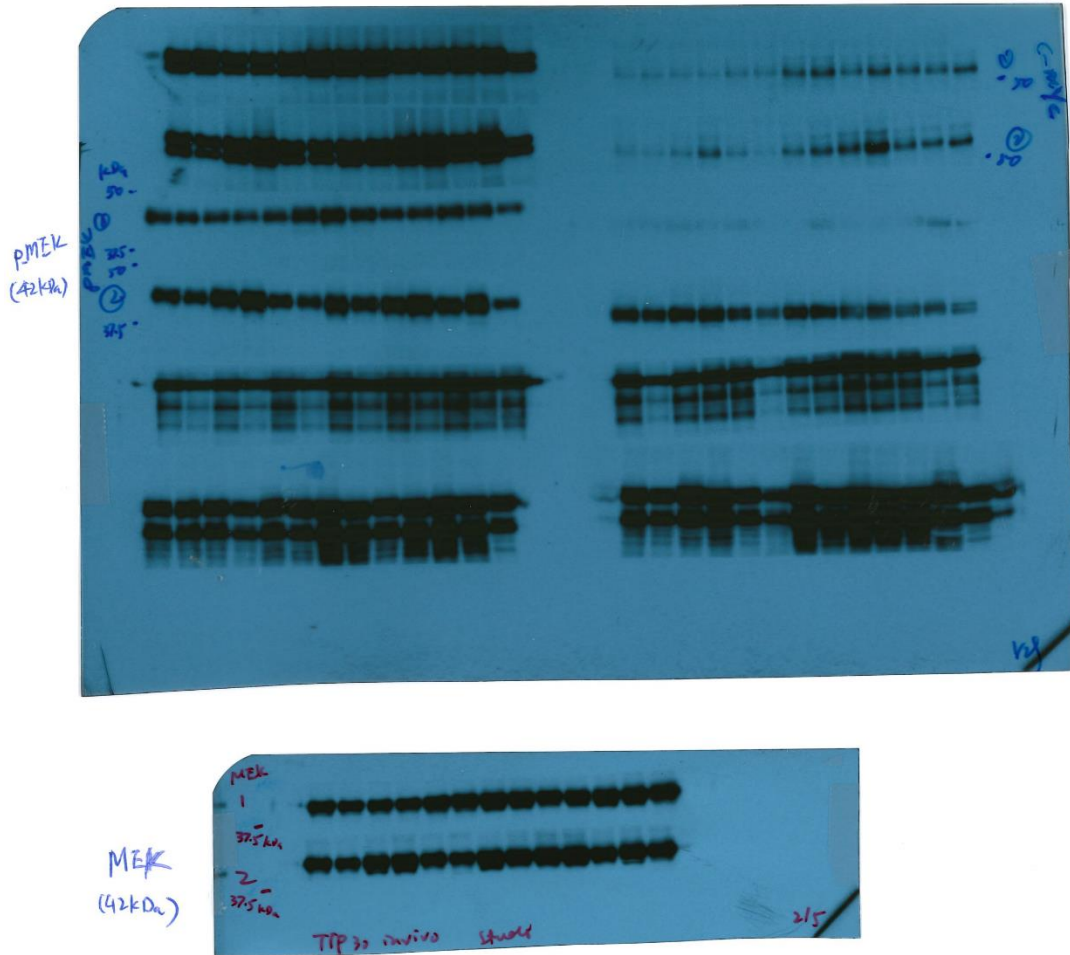

**Supplemental Figure S3-4-10.** Uncropped Western blot images showing the expression of MEK (42 kDa) and phospho-MEK (S217/221; 42 kDa) in A549 parental and A549shHTATIP2 tumor homogenates.

**HTATIP2 knockdown *IN VIVO* study**

Mouse ID: Sorafenib group: #1-1, #2-1, #3-1, #3-2, #5-1, #5-2.

Control group: #4-1, #4-2, #4-3, #4-4, #6-1, #6-2.

A – A549 parental tumors, T – A549shHTATIP2 tumors

From Left to Right:

Membrane 1: A1-1, T1-1, A2-1, T2-1, A3-1, T3-1, A4-1, T4-1, A4-2, T4-2, A4-3, T4-3, positive control

Membrane 2: A3-2, T3-2, A5-1, T5-1, A5-2, T5-2, A4-4, T4-4, A6-1, T6-1, A6-2, T6-2, positive control

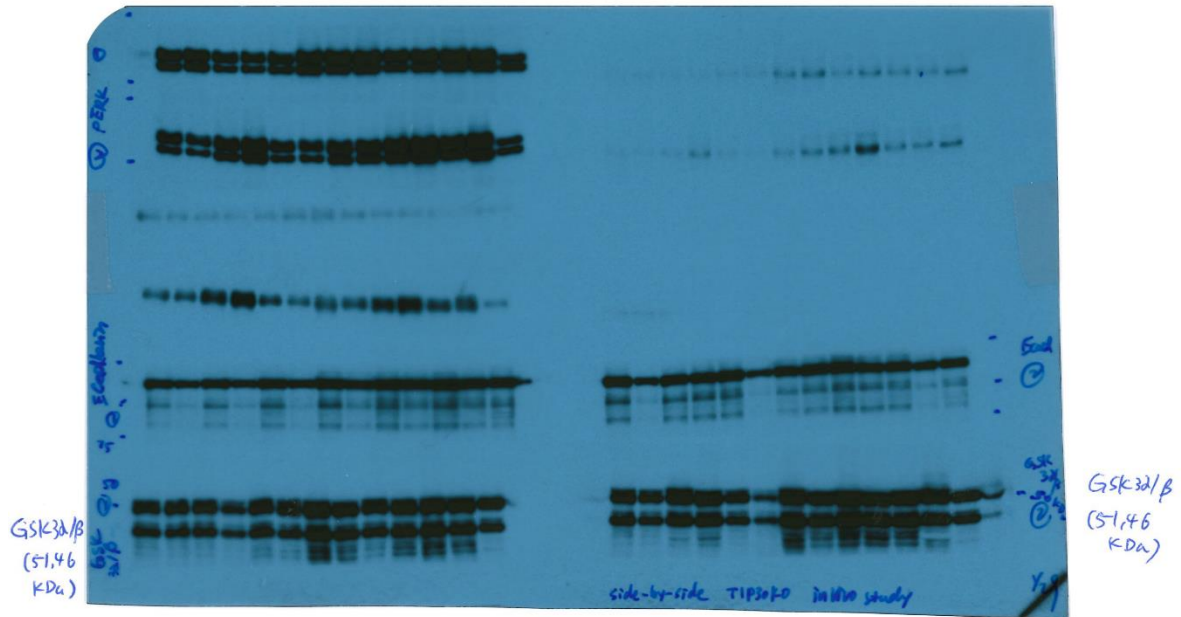

**Supplemental Figure S3-4-11.** Uncropped Western blot images showing the expression of GSK3 $\alpha$ / $\beta$  (51, 46 kDa) in A549 parental and A549shHTATIP2 tumor homogenates.



**HTATIP2 knockdown *IN VIVO* study**

Mouse ID: Sorafenib group: #1-1, #2-1, #3-1, #3-2, #5-1, #5-2.

Control group: #4-1, #4-2, #4-3, #4-4, #6-1, #6-2.

A – A549 parental tumors, T – A549shHTATIP2 tumors

From Left to Right:

Membrane 1: A1-1, T1-1, A2-1, T2-1, A3-1, T3-1, A4-1, T4-1, A4-2, T4-2, A4-3, T4-3, positive control

Membrane 2: A3-2, T3-2, A5-1, T5-1, A5-2, T5-2, A4-4, T4-4, A6-1, T6-1, A6-2, T6-2, positive control

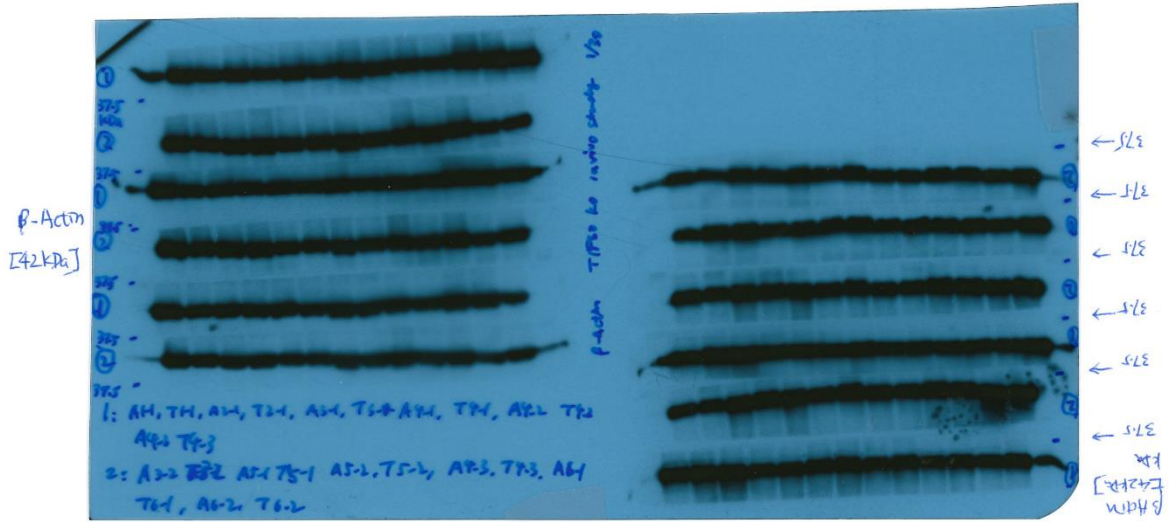

**Supplemental Figure S3-4-12.** Uncropped Western blot images showing the expression of  $\beta$ -Actin (42 kDa) in A549 parental and A549shHTATIP2 tumor homogenates.
